# Supplementary material for: Structural design strategies for superionic sodium halide solid electrolytes
Source: Royal Society of Chemistry journal article supplement (doi:10.1039/d2ta05158c), 2022-01-01
Supplement: d2ta05158c1.pdf [file d2ta05158c1.pdf]

## Supporting Information

### Structural design strategies for superionic sodium halide solid electrolytes

Seungho Yu,<sup>a,b,\*</sup>, Kwangnam Kim,<sup>c</sup> Brandon C. Wood,<sup>c</sup> Hun-Gi Jung,<sup>a,b</sup> Kyung Yoon Chung,<sup>a,b</sup>

<sup>a</sup>Energy Storage Research Center, Korea Institute of Science and Technology, 5, Hwarang-ro 14-gil, Seongbuk-gu, Seoul 02792, Republic of Korea

<sup>b</sup>Division of Energy & Environment Technology, KIST School, Korea University of Science and Technology, Seoul 02792, Republic of Korea

<sup>c</sup>Materials Science Division, Lawrence Livermore National Laboratory, Livermore, 94550, USA

Corresponding Author

\*E-mail: [shyu@kist.re.kr](mailto:shyu@kist.re.kr)

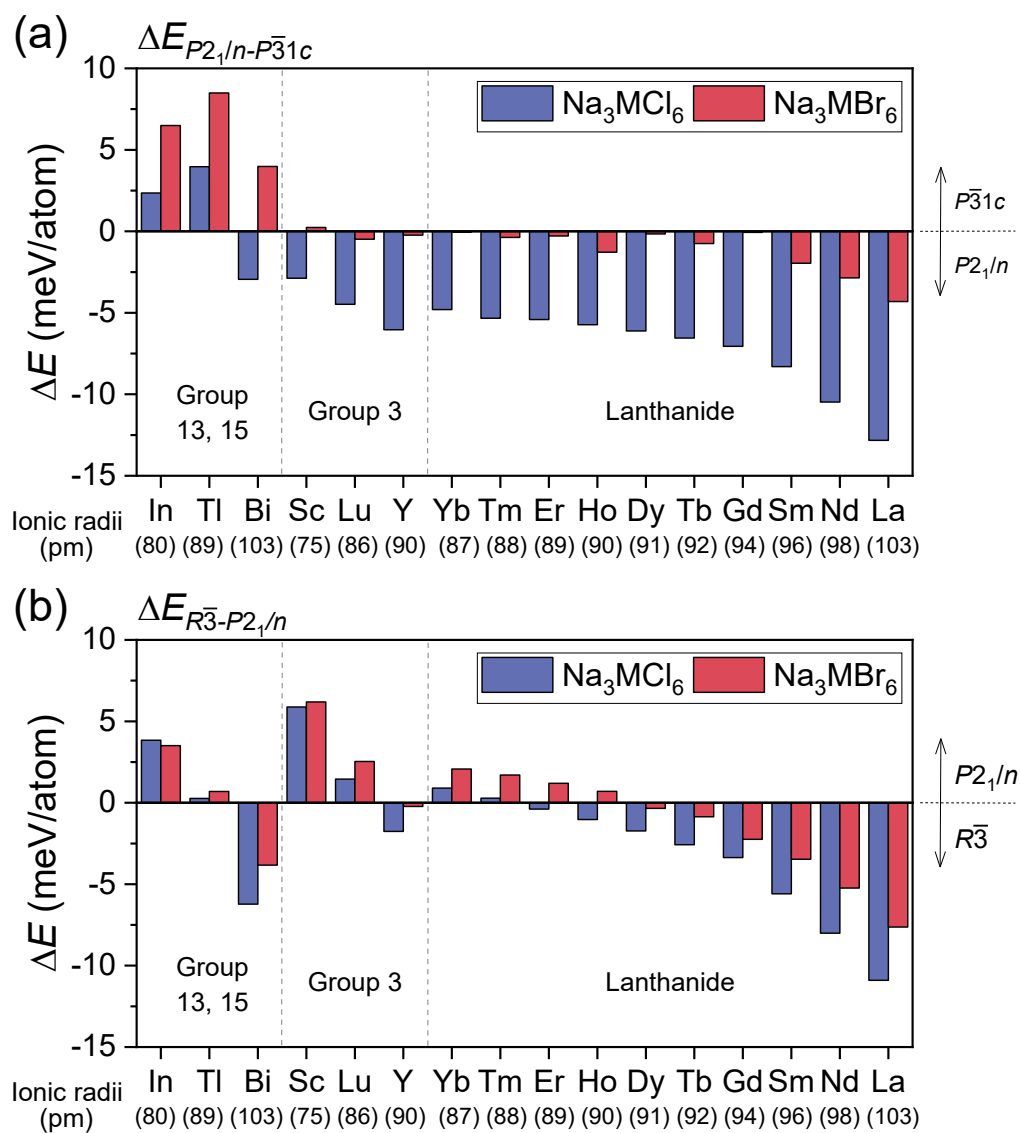

**Figure S1.** Energy differences among the crystal structures of (a)  $P_{\bar{3}1c}$  and  $P_{21/n}$ , (b)  $R\bar{3}$  and  $P_{21/n}$  for  $\text{Na}_3\text{MX}_6$  ( $X = \text{Cl}$  and  $\text{Br}$ ), as a function of the effective ionic radii of M in group 13 and 15 elements, group 3 elements and lanthanides.

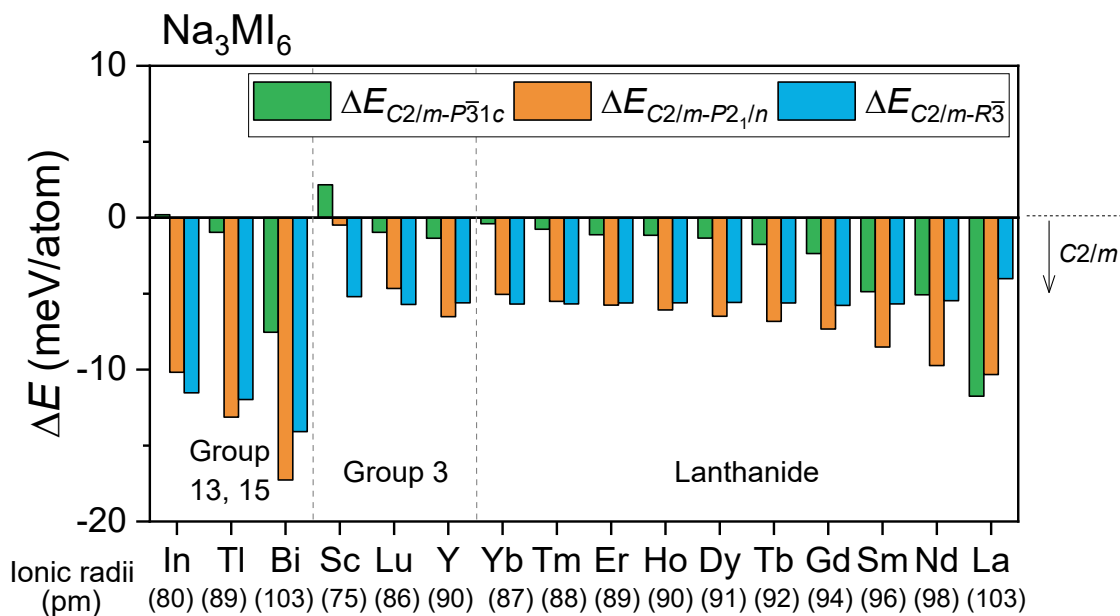

**Figure S2.** Energy differences of the crystal structures of  $P\bar{3}1c$ ,  $P2_1/n$  and  $R\bar{3}$  against the crystal structure of  $C2/m$  for  $\text{Na}_3\text{MI}_6$  ( $\Delta E_{C2/m-P\bar{3}1c}$  (orange),  $\Delta E_{C2/m-P2_1/n}$  (green) and  $\Delta E_{C2/m-R\bar{3}}$  (light blue)), as a function of the effective ionic radii of M in group 13 and 15 elements, group 3 elements and lanthanides. Negative values of  $\Delta E$  indicate the preference of the  $C2/m$  phase compared to other phases.

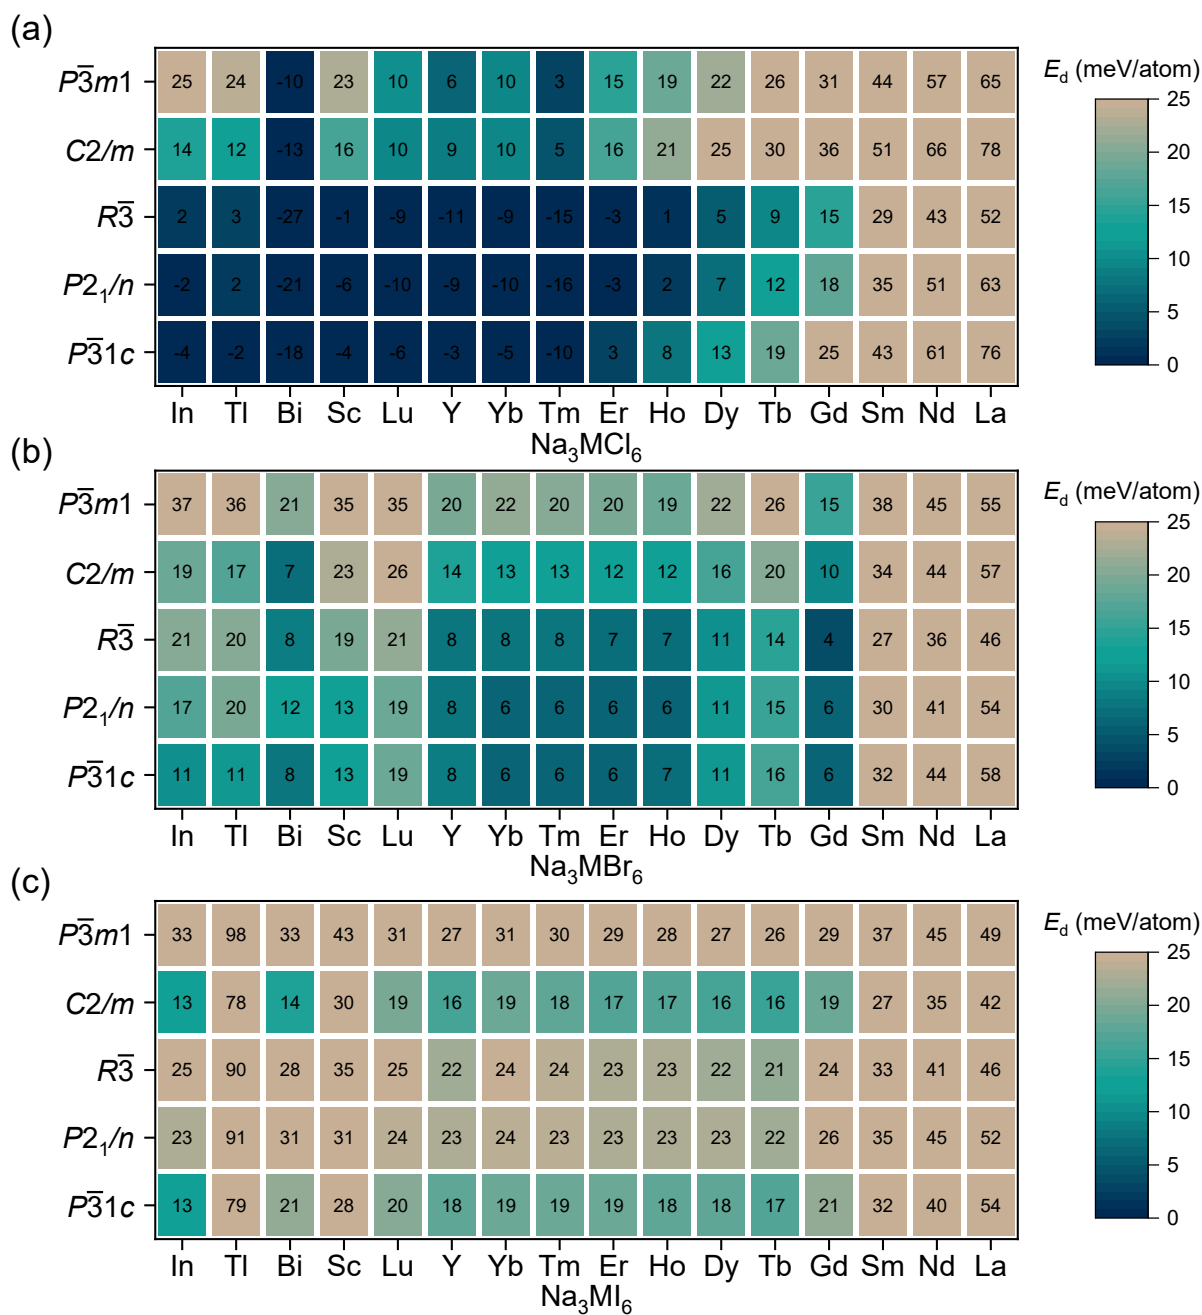

**Figure S3.** Heat map of the decomposition energy ( $E_d$ ) for sodium halides (a)  $\text{Na}_3\text{MCl}_6$ , (b)  $\text{Na}_3\text{MBr}_6$  and (c)  $\text{Na}_3\text{MI}_6$  with the crystal structures of  $P\bar{3}1c$ ,  $P2_1/n$ ,  $R\bar{3}$ ,  $C2/m$  and  $P\bar{3}m1$ . The values of  $E_d$  for  $\text{Na}_3\text{MX}_6$  ( $X = \text{Cl}, \text{Br}, \text{I}$ ) are shown in the heat map.

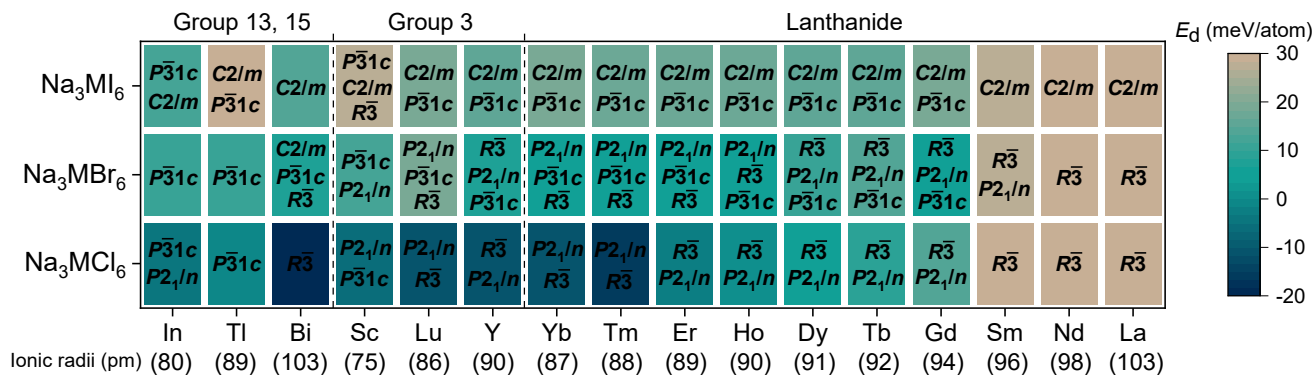

**Figure S4.** Heat map for the decomposition energy ( $E_d$ ) of Na halides ( $\text{Na}_3\text{MX}_6$ ,  $X = \text{Cl}, \text{Br}, \text{and I}$ ) against the competing phases  $\text{NaX}$  and  $\text{MX}_3$ . The most stable phase among the crystal structures of  $P\bar{3}1c$ ,  $P2_1/n$ ,  $R\bar{3}$ ,  $C2/m$  and  $P\bar{3}m1$  was used to evaluate  $E_d$ . The most stable and were indicated in Figure 1(a), while the other phases were also denoted in Figure S4 when the decomposition energy ( $E_d$ ) was comparable within 3 meV/atom.

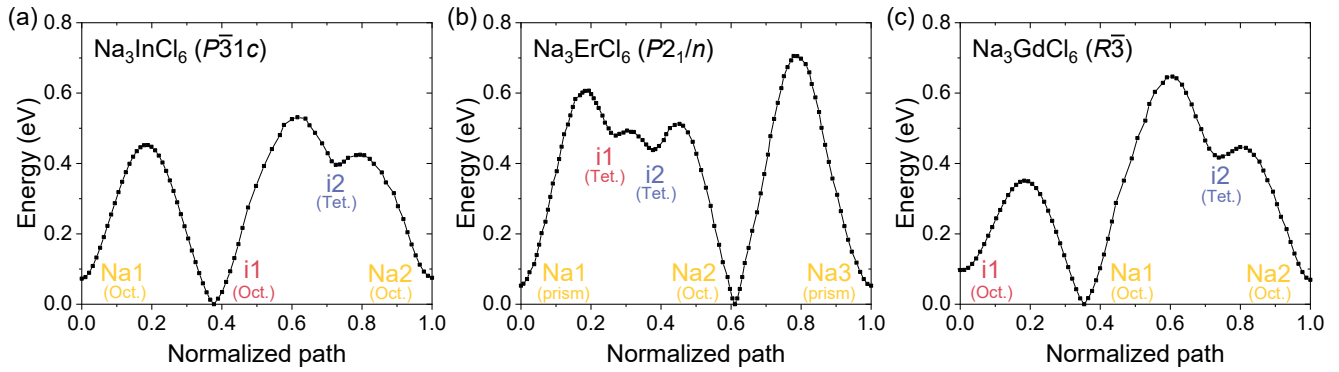

**Figure S5.** Na-ion migration energy barriers along the migration paths in (a)  $\text{Na}_3\text{InCl}_6$  (trigonal  $P\bar{3}1c$ ), (b)  $\text{Na}_3\text{ErCl}_6$  (monoclinic  $P2_1/n$ ) and (c)  $\text{Na}_3\text{GdCl}_6$  (trigonal  $R\bar{3}$ ) calculated using the BVSE method.

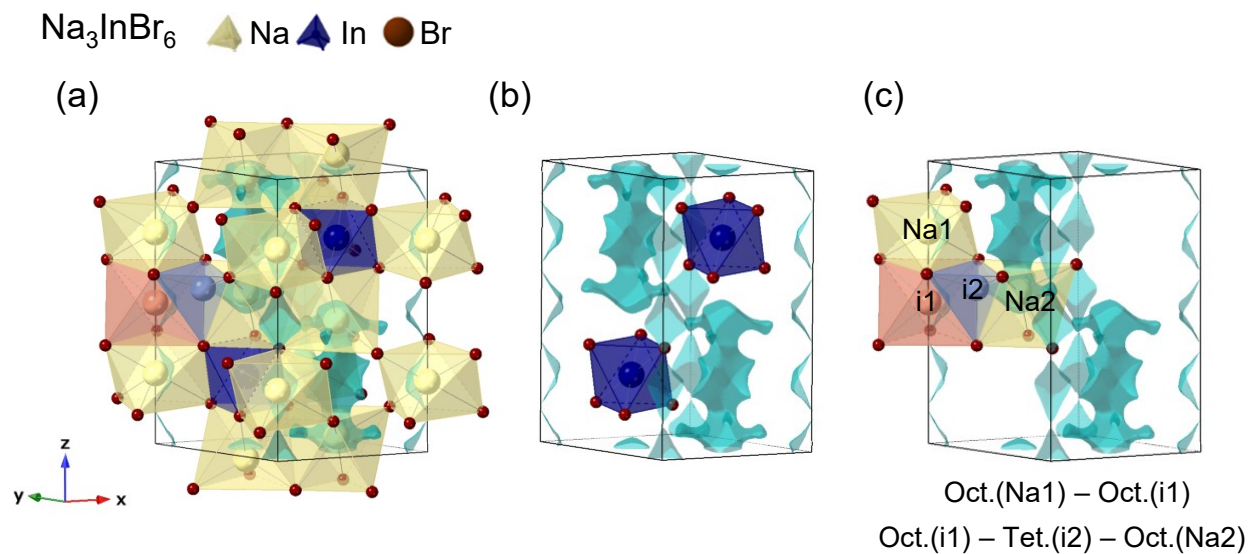

**Figure S6.** Na-ion potential energy landscape of  $\text{Na}_3\text{InBr}_6$  (trigonal  $P\bar{3}1c$ ) calculated using the BVSE method, including (a-b) the isosurface of Na-ion probability distribution (light blue),  $\text{NaBr}_6$  and  $\text{InBr}_6$  octahedra (yellow and blue, respectively), (c) one-dimensional path between octahedral sites (Na1-i1) and three-dimensional path between octahedral sites via tetrahedral interstitial sites (i1-i2-Na2).

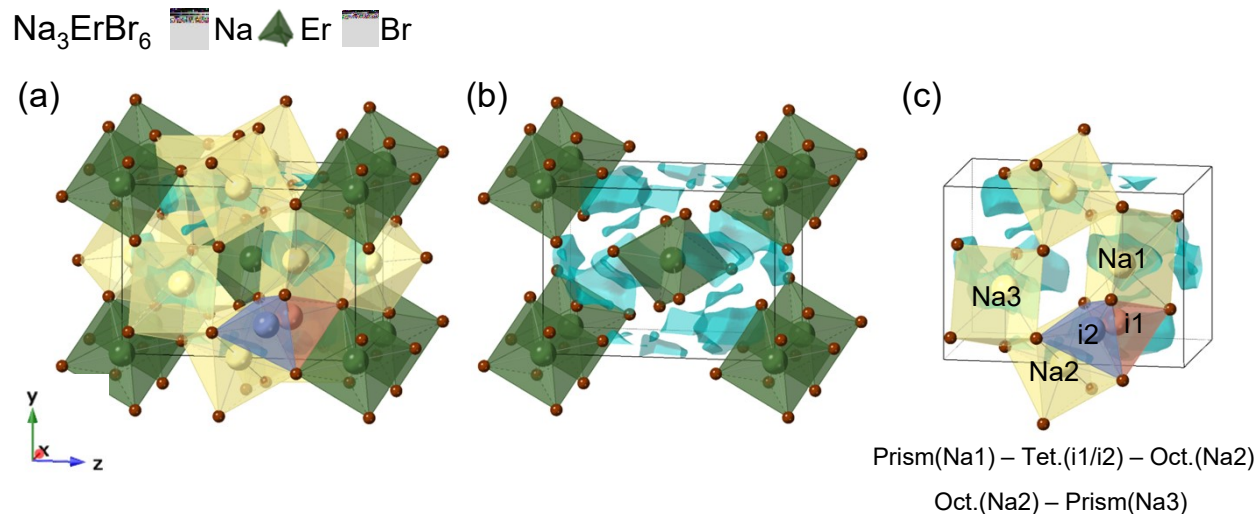

**Figure S7.** Na-ion potential energy landscape of  $\text{Na}_3\text{ErBr}_6$  (monoclinic  $P2_1/n$ ) calculated using the BVSE method, including (a-b) the isosurface of Na-ion probability distribution (light blue),  $\text{NaBr}_6$  and  $\text{ErBr}_6$  octahedra (yellow and dark green, respectively), (c) migration paths between octahedral and prism sites via tetrahedral interstitial sites (Na1-i1/i2-Na2) and between octahedral and prism sites (Na2-Na3).



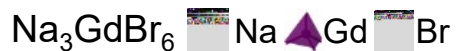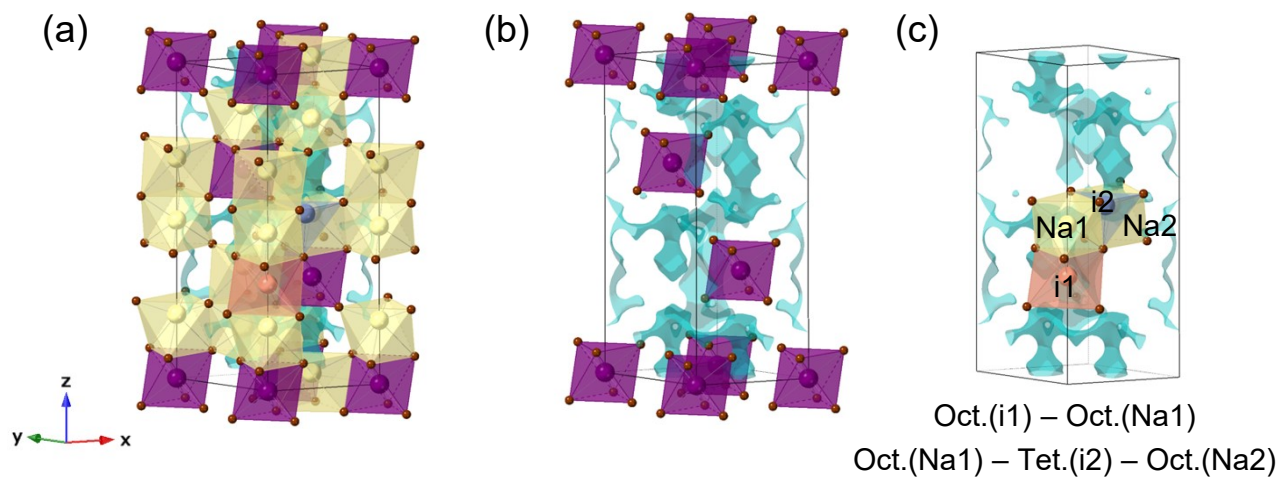

**Figure S8.** Na-ion potential energy landscape of  $\text{Na}_3\text{GdBr}_6$  (trigonal  $R\bar{3}$ ) calculated using the BVSE method, including (a-b) the isosurface of Na-ion probability distribution (light blue),  $\text{NaBr}_6$  and  $\text{GdBr}_6$  octahedra (yellow and purple, respectively), (c) one-dimensional path between octahedral sites (i1-Na1) and three-dimensional path between octahedral sites via tetrahedral interstitial sites (Na1-i2-Na2).

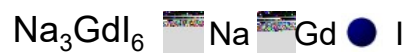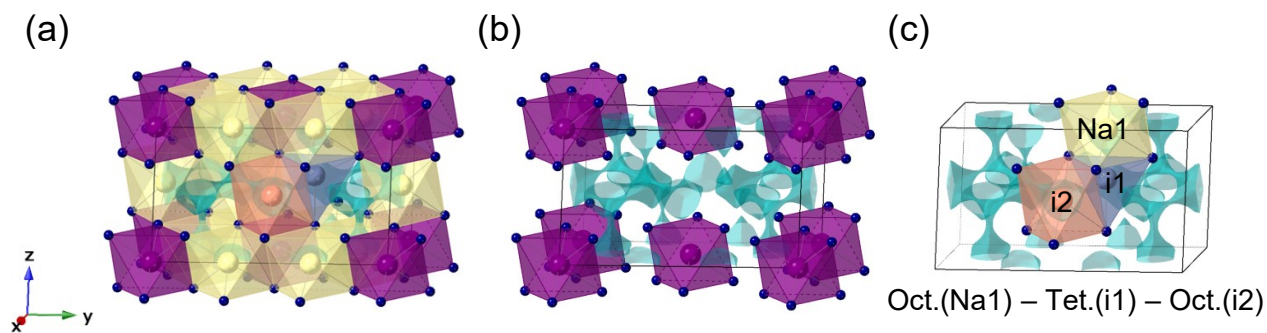

**Figure S9.** Na-ion potential energy landscape of  $\text{Na}_3\text{GdI}_6$  (monoclinic  $C2/m$ ) calculated using the BVSE method, including (a-b) the isosurface of Na-ion probability distribution (light blue),  $\text{NaI}_6$  and  $\text{GdI}_6$  octahedra (yellow and purple, respectively), (c) three-dimensional path between octahedral sites via tetrahedral interstitial sites (Na1-i1-i2).

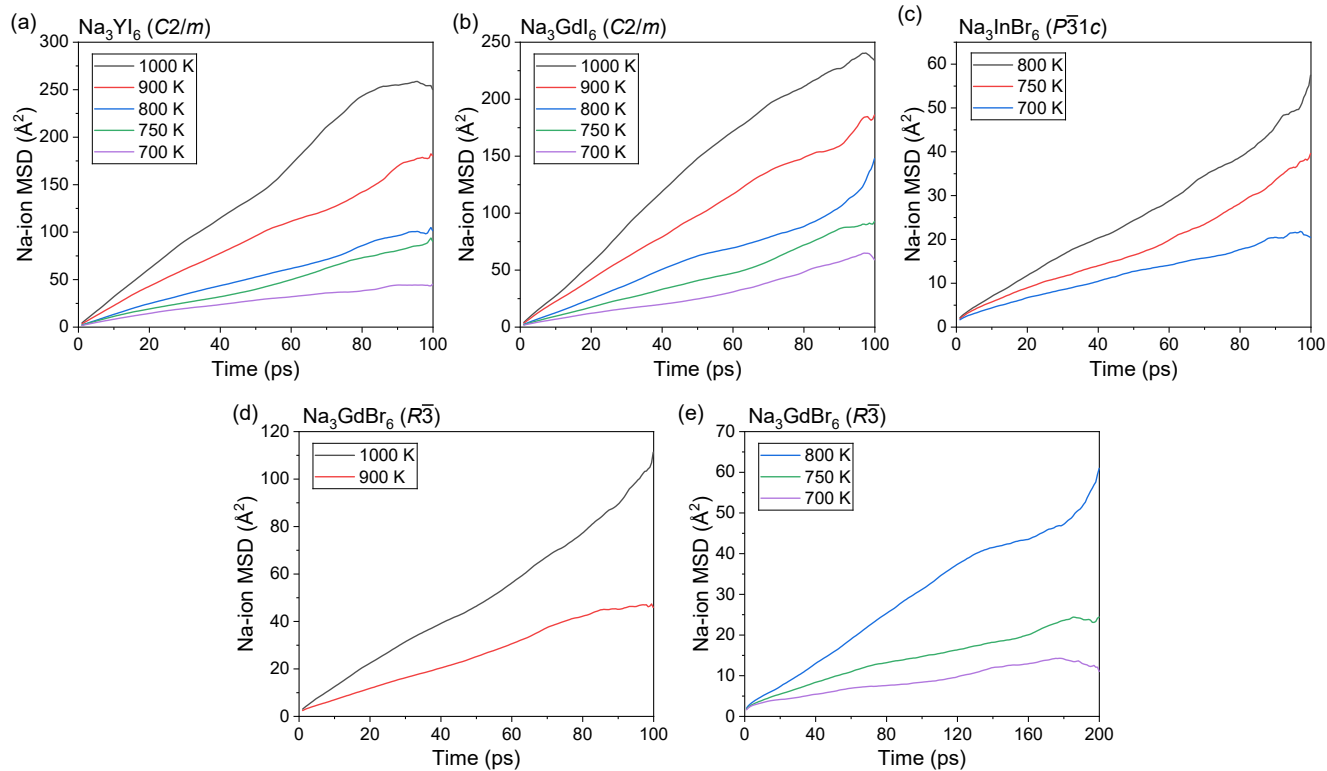

**Figure S10.** Na-ion MSD at 700–1000 K for (a)  $\text{Na}_3\text{YI}_6$  (monoclinic  $C2/m$ ), (b)  $\text{Na}_3\text{GdI}_6$  (monoclinic  $C2/m$ ), (c)  $\text{Na}_3\text{InBr}_6$  (trigonal  $P\bar{3}1c$ ), (d, e)  $\text{Na}_3\text{GdBr}_6$  (trigonal  $R\bar{3}$ ).

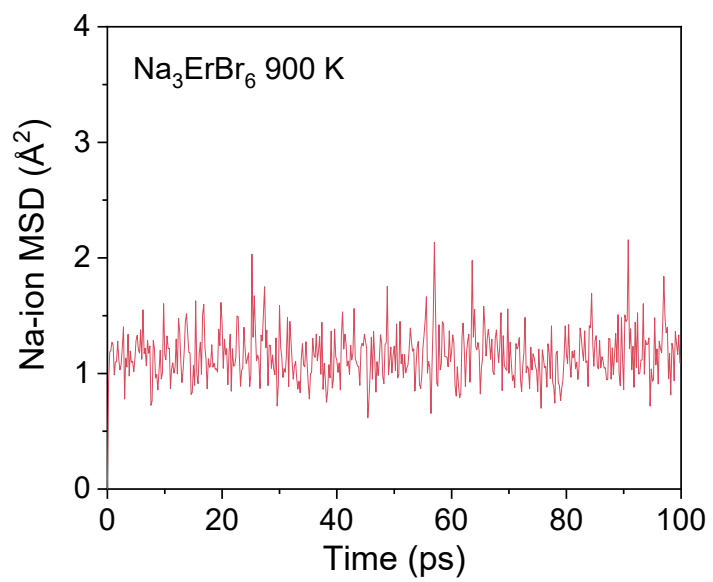

**Figure S11.** Na-ion MSD over a 100-ps window for Na<sub>3</sub>ErBrCl<sub>6</sub> at 900 K.

$\text{Na}_3\text{InBr}_6$  ( $P\bar{3}1c$ )

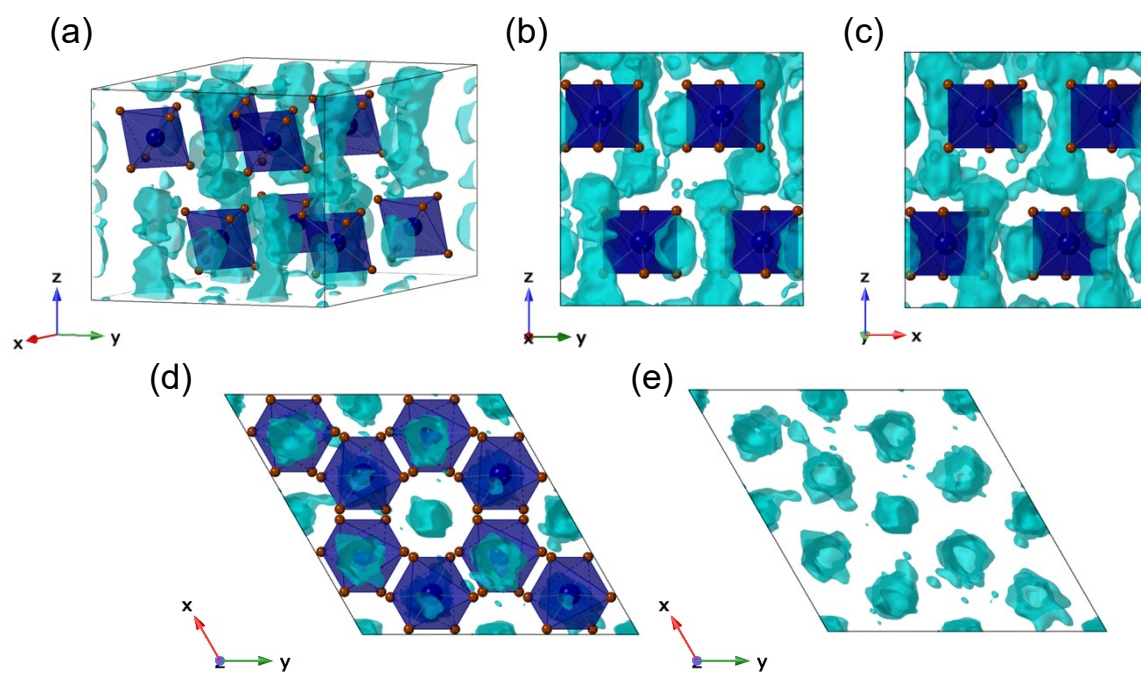

**Figure S12.** Isosurfaces of the Na-ion probability densities (light blue) from 50 ps AIMD calculations at 800 K plotted using an isosurface value of  $2P_0$  for  $\text{Na}_3\text{InBr}_6$  (trigonal  $P\bar{3}1c$ ), with the view along x, y, z directions. The blue octahedra corresponds to  $\text{InBr}_6$ .

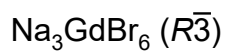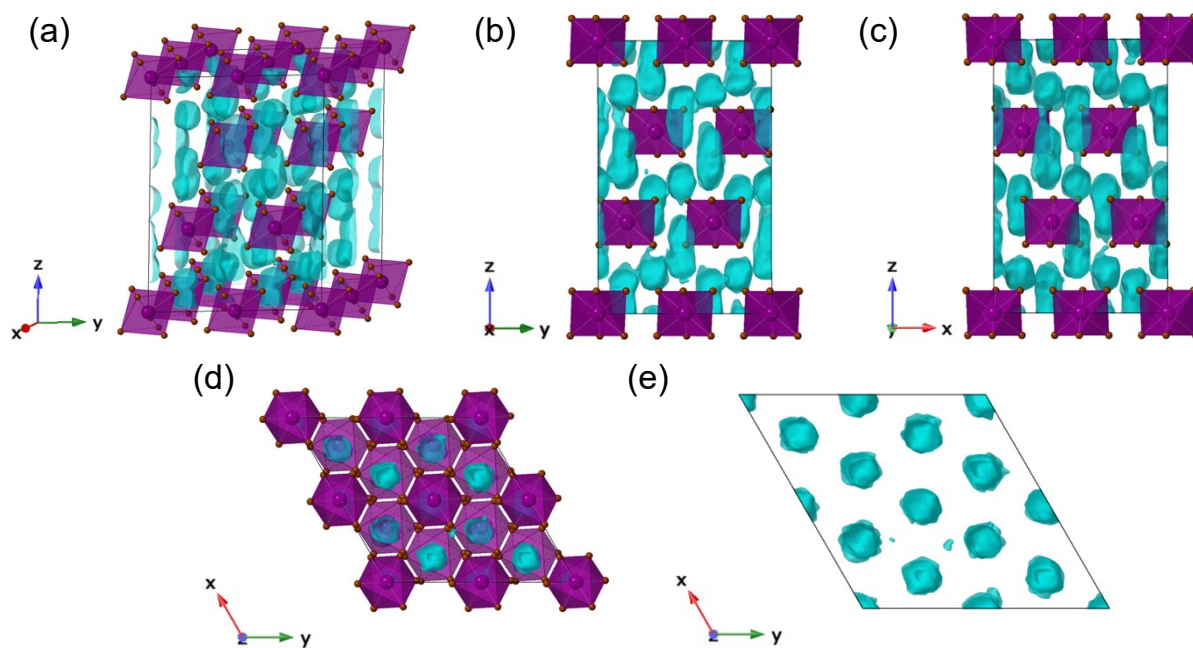

**Figure S13.** Isosurfaces of the Na-ion probability densities (light blue) from 50 ps AIMD calculations at 800 K plotted using an isosurface value of  $2P_0$  for  $\text{Na}_3\text{GdBr}_6$  (trigonal  $R\bar{3}$ ), with the view along x, y, z directions. The purple octahedra corresponds to  $\text{GdBr}_6$ .

$\text{Na}_3\text{GdI}_6$  ( $C2/m$ )

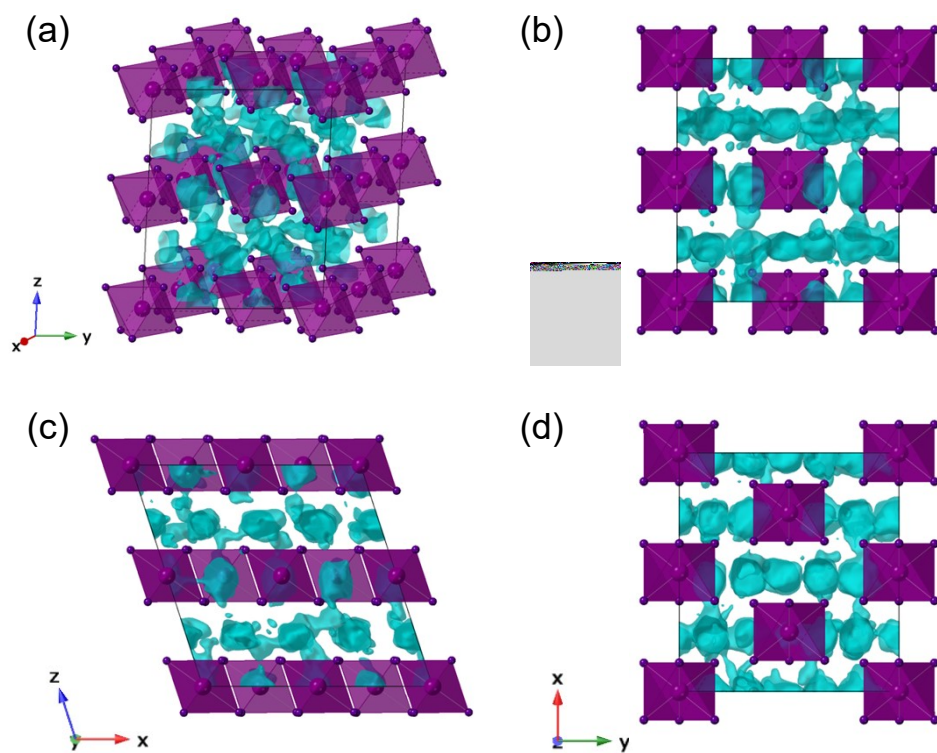

**Figure S14.** Isosurfaces of the Na-ion probability densities (light blue) from 50 ps AIMD calculations at 800 K plotted using an isosurface value of  $2P_0$  for  $\text{Na}_3\text{GdI}_6$  (monoclinic  $C2/m$ ), with the view along x, y, z directions. The purple octahedra corresponds to  $\text{GdI}_6$ .

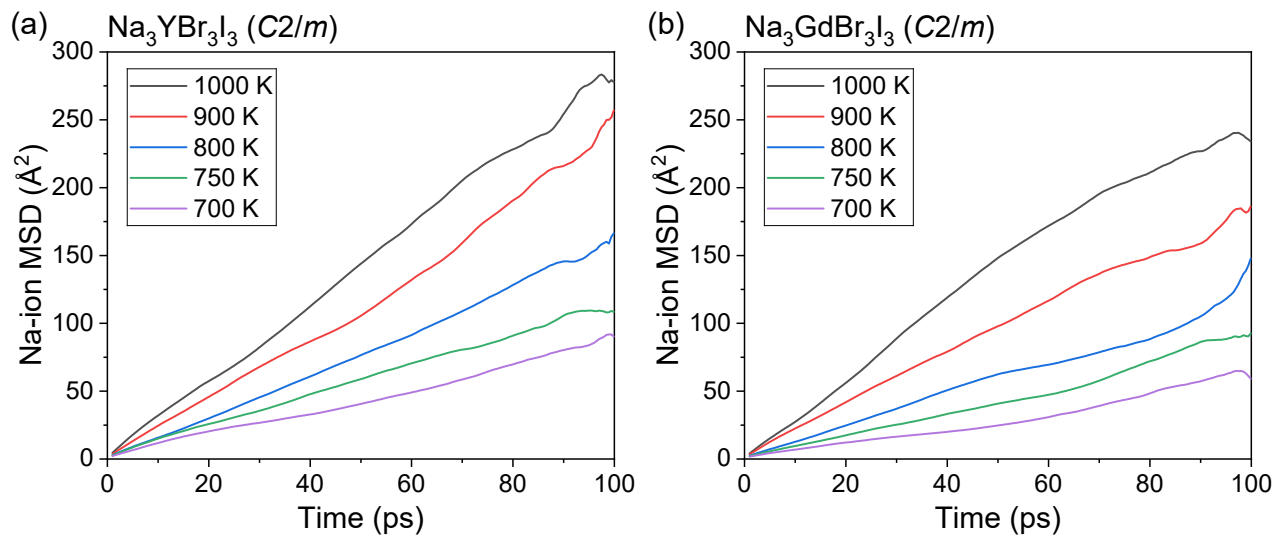

**Figure S15.** Na-ion MSD at 700–1000 K for monoclinic  $C2/m$  (a)  $\text{Na}_3\text{YBr}_3\text{I}_3$  and (b)  $\text{Na}_3\text{GdBr}_3\text{I}_3$ .



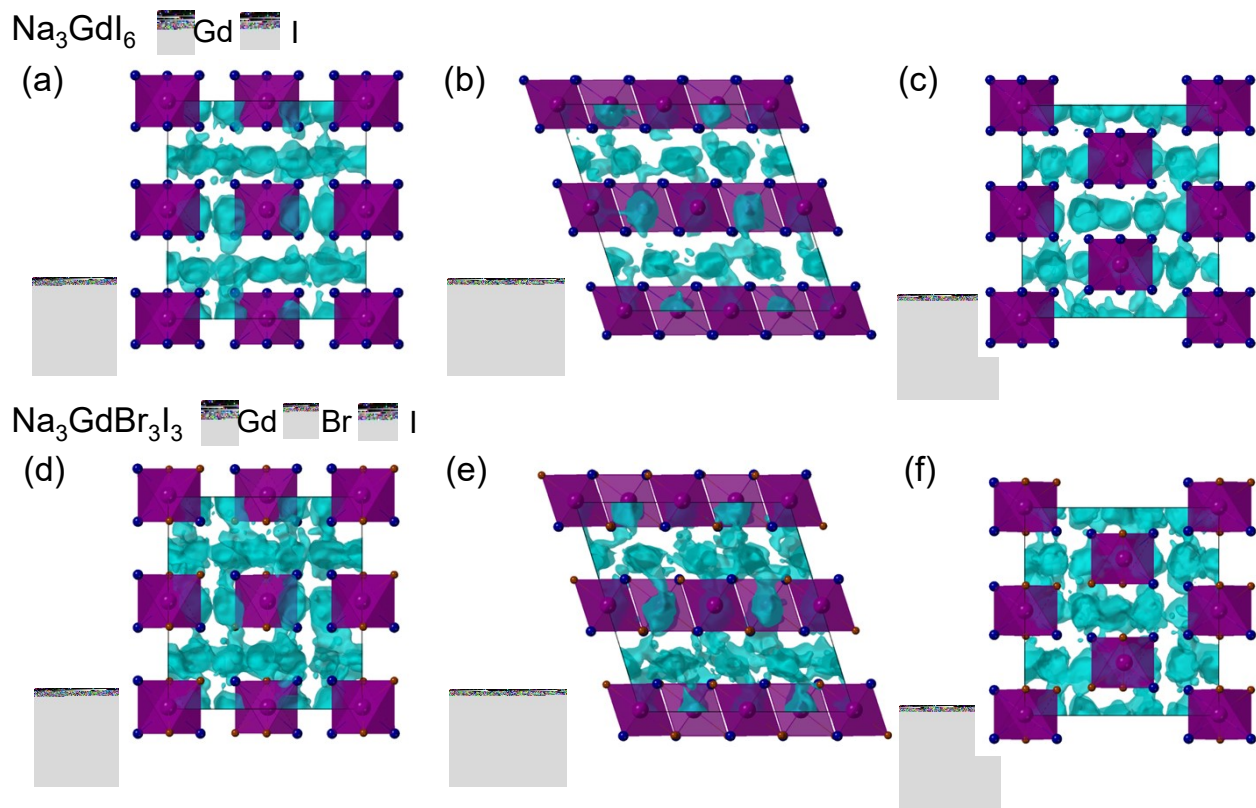

**Figure S16.** Isosurfaces of the Na-ion probability densities (light blue) from 50 ps AIMD calculations at 800 K plotted using an isosurface value of  $2P_0$  for (a-c)  $\text{Na}_3\text{GdI}_6$  and (d-f)  $\text{Na}_3\text{GdBr}_3\text{I}_3$ , with the view along x, y, z directions.

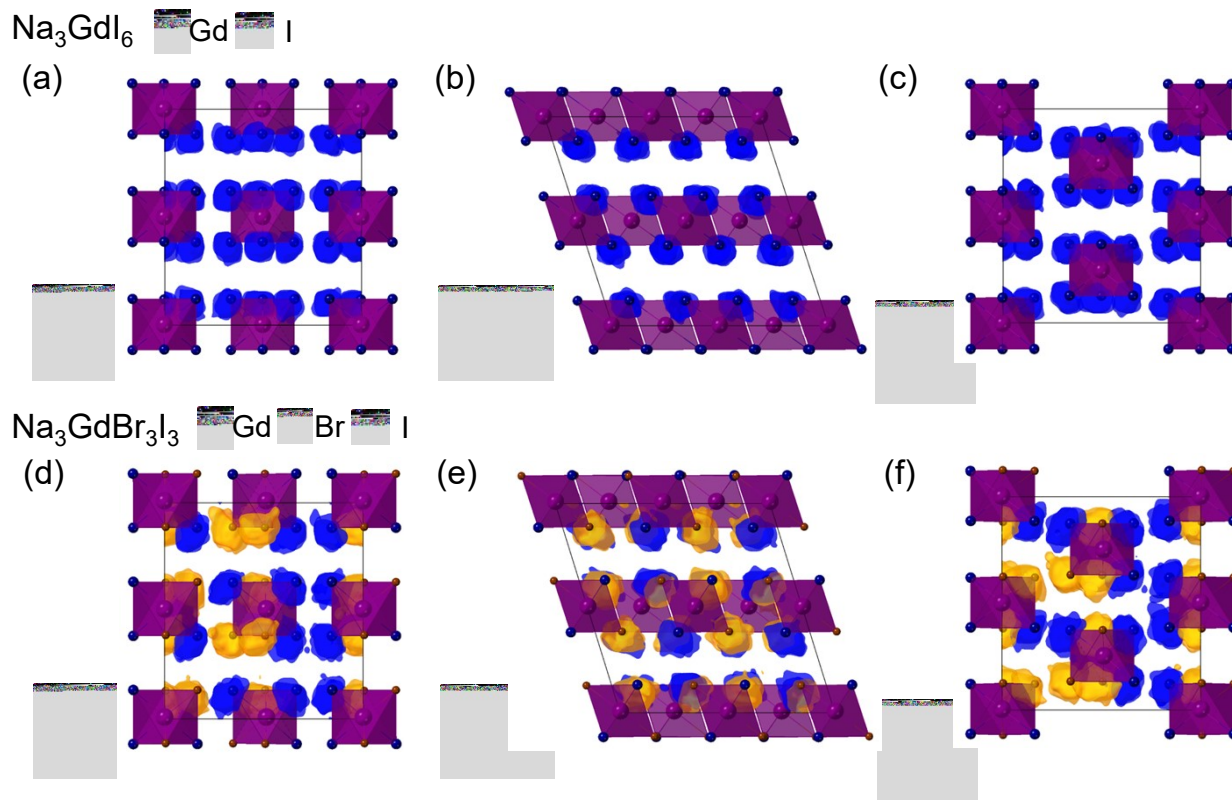

**Figure S17.** Isosurfaces of the ionic probability densities for Br and I (blue and orange, respectively) from 50 ps AIMD calculations at 800 K plotted using an isosurface value of  $2P_0$  for (a-c)  $\text{Na}_3\text{GdI}_6$  and (d-f)  $\text{Na}_3\text{GdBr}_3\text{I}_3$ , with the view along x, y, z directions.

**Table S1.** Details of the structural information of fully occupied  $C2/m$  and  $P\bar{3}m1$  phases.

| Space group        | monoclinic $C2/m$          |        |        |        | trigonal $P\bar{3}m1$     |        |        |        |
|--------------------|----------------------------|--------|--------|--------|---------------------------|--------|--------|--------|
| Space group number | 12                         |        |        |        | 164                       |        |        |        |
| Compound           | $\text{Li}_3\text{ScCl}_6$ |        |        |        | $\text{Li}_3\text{YCl}_6$ |        |        |        |
| Lattice a (Å)      | 6.2593                     |        |        |        | 11.0426                   |        |        |        |
| Lattice b (Å)      | 10.9587                    |        |        |        | 11.0426                   |        |        |        |
| Lattice c (Å)      | 6.2465                     |        |        |        | 6.0124                    |        |        |        |
| Angle $\alpha$ (°) | 90                         |        |        |        | 90                        |        |        |        |
| Angle $\beta$ (°)  | 108.588                    |        |        |        | 90                        |        |        |        |
| Angle $\gamma$ (°) | 90                         |        |        |        | 120                       |        |        |        |
| Ionic Position     | Li1                        | 0.5000 | 0.3285 | 0.5000 | Li1                       | 0.3397 | 0.3397 | 0.0000 |
|                    | Li2                        | 0.5000 | 0.0000 | 0.5000 | Li2                       | 0.6603 | 0.0000 | 0.0000 |
|                    | Li3                        | 0.5000 | 0.8264 | 0.0000 | Li3                       | 0.0000 | 0.6603 | 0.0000 |
|                    | Li4                        | 0.5000 | 0.1736 | 0.0000 | Li4                       | 0.6603 | 0.6603 | 0.0000 |
|                    | Li5                        | 0.0000 | 0.3264 | 0.0000 | Li5                       | 0.3397 | 0.0000 | 0.0000 |
|                    | Li6                        | 0.0000 | 0.6736 | 0.0000 | Li6                       | 0.0000 | 0.3397 | 0.0000 |
|                    | Sc1                        | 0.0000 | 0.0000 | 0.0000 | Li7                       | 0.6700 | 0.0000 | 0.5000 |
|                    | Sc2                        | 0.5000 | 0.5000 | 0.0000 | Li8                       | 0.0000 | 0.6700 | 0.5000 |
|                    | Cl1                        | 0.2393 | 0.8391 | 0.2365 | Li9                       | 0.3300 | 0.3300 | 0.5000 |
|                    | Cl2                        | 0.7607 | 0.8391 | 0.7635 | Y1                        | 0.0000 | 0.0000 | 0.0000 |
|                    | Cl3                        | 0.7607 | 0.1609 | 0.7635 | Y2                        | 0.3333 | 0.6667 | 0.5100 |
|                    | Cl4                        | 0.2393 | 0.1609 | 0.2365 | Y3                        | 0.6667 | 0.3333 | 0.4900 |
|                    | Cl5                        | 0.7393 | 0.3391 | 0.2365 | Cl1                       | 0.1135 | 0.8865 | 0.7681 |
|                    | Cl6                        | 0.2607 | 0.3391 | 0.7635 | Cl2                       | 0.1135 | 0.2270 | 0.7681 |
|                    | Cl7                        | 0.2607 | 0.6609 | 0.7635 | Cl3                       | 0.7730 | 0.8865 | 0.7681 |
|                    | Cl8                        | 0.7393 | 0.6609 | 0.2365 | Cl4                       | 0.8865 | 0.1135 | 0.2319 |
|                    | Cl9                        | 0.7590 | 0.0000 | 0.2324 | Cl5                       | 0.2270 | 0.1135 | 0.2319 |
|                    | Cl10                       | 0.2410 | 0.0000 | 0.7676 | Cl6                       | 0.8865 | 0.7730 | 0.2319 |
| Cl11               | 0.2590                     | 0.5000 | 0.2324 | Cl7    | 0.2215                    | 0.7785 | 0.2676 |        |
| Cl12               | 0.7410                     | 0.5000 | 0.7676 | Cl8    | 0.2215                    | 0.4430 | 0.2676 |        |
|                    |                            |        |        | Cl9    | 0.5570                    | 0.7785 | 0.2676 |        |
|                    |                            |        |        | Cl10   | 0.7785                    | 0.2215 | 0.7324 |        |
|                    |                            |        |        | Cl11   | 0.4430                    | 0.2215 | 0.7324 |        |
|                    |                            |        |        | Cl12   | 0.7785                    | 0.5570 | 0.7324 |        |
|                    |                            |        |        | Cl13   | 0.4454                    | 0.5546 | 0.7559 |        |
|                    |                            |        |        | Cl14   | 0.4454                    | 0.8908 | 0.7559 |        |
|                    |                            |        |        | Cl15   | 0.1092                    | 0.5546 | 0.7559 |        |
|                    |                            |        |        | Cl16   | 0.5546                    | 0.4454 | 0.2441 |        |
|                    |                            |        |        | Cl17   | 0.8908                    | 0.4454 | 0.2441 |        |
|                    |                            |        |        | Cl18   | 0.5546                    | 0.1092 | 0.2441 |        |

**Table S2.** Total energy differences among the crystal structures of  $P\bar{3}1c$ ,  $P2_1/n$ ,  $R\bar{3}$ ,  $C2/m$  and  $P\bar{3}m1$  for  $\text{Na}_3\text{MX}_6$  (X = Cl, Br, I).

| $\text{Na}_3\text{MX}_6$   | Type of M  | $\Delta E$ (meV/atom) |                     |                         |                 |                   |
|----------------------------|------------|-----------------------|---------------------|-------------------------|-----------------|-------------------|
|                            |            | $P2_1/n - P\bar{3}1c$ | $R\bar{3} - P2_1/n$ | $R\bar{3} - P\bar{3}1c$ | $C2/m - P2_1/n$ | $C2/m - R\bar{3}$ |
| $\text{Na}_3\text{AlCl}_6$ | Group 13   | -0.1                  | 12.1                | 12.0                    | 28.0            | 16.0              |
| $\text{Na}_3\text{GaCl}_6$ |            | 2.5                   | 10.7                | 13.2                    | 21.9            | 11.1              |
| $\text{Na}_3\text{InCl}_6$ |            | 2.4                   | 3.8                 | 6.2                     | 16.0            | 12.1              |
| $\text{Na}_3\text{TlCl}_6$ |            | 4.0                   | 0.3                 | 4.2                     | 9.7             | 9.4               |
| $\text{Na}_3\text{BiCl}_6$ | Group 15   | -2.9                  | -6.2                | -9.2                    | 8.0             | 14.2              |
| $\text{Na}_3\text{ScCl}_6$ | Group 3    | -2.9                  | 5.9                 | 3.0                     | 22.4            | 16.6              |
| $\text{Na}_3\text{LuCl}_6$ |            | -4.5                  | 1.5                 | -3.0                    | 20.2            | 18.8              |
| $\text{Na}_3\text{YCl}_6$  |            | -6.0                  | -1.8                | -7.8                    | 18.4            | 20.1              |
| $\text{Na}_3\text{YbCl}_6$ | Lanthanide | -4.8                  | 0.9                 | -3.9                    | 19.9            | 19.0              |
| $\text{Na}_3\text{TmCl}_6$ |            | -5.3                  | 0.3                 | -5.1                    | 20.2            | 19.9              |
| $\text{Na}_3\text{ErCl}_6$ |            | -5.4                  | -0.4                | -5.8                    | 19.1            | 19.5              |
| $\text{Na}_3\text{HoCl}_6$ |            | -5.7                  | -1.0                | -6.8                    | 18.7            | 19.7              |
| $\text{Na}_3\text{DyCl}_6$ |            | -6.1                  | -1.7                | -7.8                    | 18.3            | 20.0              |
| $\text{Na}_3\text{TbCl}_6$ |            | -6.6                  | -2.6                | -9.1                    | 17.9            | 20.5              |
| $\text{Na}_3\text{GdCl}_6$ |            | -7.1                  | -3.4                | -10.4                   | 17.5            | 20.9              |
| $\text{Na}_3\text{SmCl}_6$ |            | -8.3                  | -5.6                | -13.9                   | 16.4            | 21.9              |
| $\text{Na}_3\text{NdCl}_6$ |            | -10.5                 | -8.0                | -18.5                   | 15.5            | 23.5              |
| $\text{Na}_3\text{LaCl}_6$ |            | -12.8                 | -10.9               | -23.7                   | 14.7            | 25.6              |
| $\text{Na}_3\text{AlBr}_6$ | Group 13   | 3.2                   | 10.8                | 14.1                    | 12.2            | 1.4               |
| $\text{Na}_3\text{GaBr}_6$ |            | 5.8                   | 9.2                 | 15.0                    | 6.8             | -2.4              |
| $\text{Na}_3\text{InBr}_6$ |            | 6.5                   | 3.5                 | 10.0                    | 1.5             | -2.1              |
| $\text{Na}_3\text{TlBr}_6$ |            | 8.5                   | 0.7                 | 9.2                     | -2.6            | -3.3              |
| $\text{Na}_3\text{BiBr}_6$ | Group 15   | 4.0                   | -3.8                | 0.1                     | -5.2            | -1.4              |
| $\text{Na}_3\text{ScBr}_6$ | Group 3    | 0.2                   | 6.2                 | 6.4                     | 9.8             | 3.7               |
| $\text{Na}_3\text{LuBr}_6$ |            | -0.5                  | 2.5                 | 2.0                     | 7.4             | 4.9               |
| $\text{Na}_3\text{YBr}_6$  |            | -0.2                  | -0.2                | -0.5                    | 5.4             | 5.7               |
| $\text{Na}_3\text{YbBr}_6$ | Lanthanide | -0.1                  | 2.1                 | 2.0                     | 6.9             | 4.8               |
| $\text{Na}_3\text{TmBr}_6$ |            | -0.4                  | 1.7                 | 1.3                     | 6.6             | 4.9               |
| $\text{Na}_3\text{ErBr}_6$ |            | -0.3                  | 1.2                 | 0.9                     | 6.4             | 5.2               |

|                                   |            |      |      |       |       |       |
|-----------------------------------|------------|------|------|-------|-------|-------|
| Na <sub>3</sub> HoBr <sub>6</sub> |            | -1.3 | 0.7  | -0.6  | 6.0   | 5.3   |
| Na <sub>3</sub> DyBr <sub>6</sub> |            | -0.2 | -0.3 | -0.5  | 5.1   | 5.4   |
| Na <sub>3</sub> TbBr <sub>6</sub> |            | -0.8 | -0.9 | -1.6  | 4.7   | 5.6   |
| Na <sub>3</sub> GdBr <sub>6</sub> |            | -0.1 | -2.2 | -2.3  | 3.7   | 6.0   |
| Na <sub>3</sub> SmBr <sub>6</sub> |            | -2.0 | -3.5 | -5.4  | 3.2   | 6.7   |
| Na <sub>3</sub> NdBr <sub>6</sub> |            | -2.9 | -5.2 | -8.1  | 2.7   | 7.9   |
| Na <sub>3</sub> LaBr <sub>6</sub> |            | -4.3 | -7.6 | -11.9 | 2.5   | 10.1  |
| Na <sub>3</sub> AlI <sub>6</sub>  | Group 13   | 5.1  | 6.7  | 11.8  | -0.9  | -7.6  |
| Na <sub>3</sub> GaI <sub>6</sub>  |            | 7.0  | 6.2  | 13.1  | -3.6  | -9.7  |
| Na <sub>3</sub> InI <sub>6</sub>  |            | 10.4 | 1.3  | 11.7  | -10.2 | -11.5 |
| Na <sub>3</sub> TlI <sub>6</sub>  |            | 12.2 | -1.2 | 11.0  | -13.1 | -12.0 |
| Na <sub>3</sub> BiI <sub>6</sub>  | Group 15   | 9.7  | -3.2 | 6.5   | -17.3 | -14.1 |
| Na <sub>3</sub> ScI <sub>6</sub>  | Group 3    | 2.7  | 4.7  | 7.4   | -0.5  | -5.2  |
| Na <sub>3</sub> LuI <sub>6</sub>  |            | 3.7  | 1.0  | 4.7   | -4.7  | -5.7  |
| Na <sub>3</sub> YI <sub>6</sub>   |            | 5.2  | -0.9 | 4.2   | -6.5  | -5.6  |
| Na <sub>3</sub> YbI <sub>6</sub>  | Lanthanide | 4.6  | 0.6  | 5.3   | -5.0  | -5.7  |
| Na <sub>3</sub> TmI <sub>6</sub>  |            | 4.7  | 0.2  | 4.9   | -5.5  | -5.7  |
| Na <sub>3</sub> ErI <sub>6</sub>  |            | 4.6  | -0.1 | 4.5   | -5.8  | -5.6  |
| Na <sub>3</sub> HoI <sub>6</sub>  |            | 4.9  | -0.5 | 4.4   | -6.1  | -5.6  |
| Na <sub>3</sub> DyI <sub>6</sub>  |            | 5.1  | -0.9 | 4.2   | -6.5  | -5.6  |
| Na <sub>3</sub> TbI <sub>6</sub>  |            | 5.1  | -1.2 | 3.8   | -6.8  | -5.6  |
| Na <sub>3</sub> GdI <sub>6</sub>  |            | 5.0  | -1.6 | 3.4   | -7.3  | -5.8  |
| Na <sub>3</sub> SmI <sub>6</sub>  |            | 3.6  | -2.8 | 0.8   | -8.5  | -5.7  |
| Na <sub>3</sub> NdI <sub>6</sub>  |            | 4.7  | -4.3 | 0.4   | -9.7  | -5.5  |
| Na <sub>3</sub> LaI <sub>6</sub>  |            | -1.4 | -6.3 | -7.7  | -10.3 | -4.0  |

**Table S3.** Crystal structure of  $\text{MX}_3$  ( $X = \text{Cl}, \text{Br}, \text{I}$ ) in the Inorganic Crystal Structure Database (ICSD). If  $\text{MX}_3$  phase is not available in the ICSD, most stable phase among the experimental structures was predicted.

| $\text{MX}_3$   | Type of M  | $M_{\text{Radii}}$<br>(pm) | ICSD<br>ID | Space group       | Crystal<br>system | Predicted phase  |
|-----------------|------------|----------------------------|------------|-------------------|-------------------|------------------|
| $\text{AlCl}_3$ | Group 13   | 53.5                       | 39566      | $C2/m$ (12)       | Monoclinic        |                  |
| $\text{GaCl}_3$ |            | 62                         | 413455     | $C2/m$ (12)       | Monoclinic        |                  |
| $\text{InCl}_3$ |            | 80                         | N/A        |                   |                   | $R\bar{3}$ (148) |
| $\text{TlCl}_3$ |            | 88.5                       | N/A        |                   |                   | $R\bar{3}$ (148) |
| $\text{BiCl}_3$ | Group 15   | 103                        | N/A        |                   |                   | $Cmcm$ (63)      |
| $\text{ScCl}_3$ | Group 3    | 74.5                       | 38235      | $R\bar{3}$ (148)  | Trigonal          |                  |
| $\text{LuCl}_3$ |            | 86.1                       | N/A        |                   |                   | $R\bar{3}$ (148) |
| $\text{YCl}_3$  |            | 90                         | 15684      | $C2/m$ (12)       | Monoclinic        |                  |
| $\text{YbCl}_3$ | Lanthanide | 86.8                       | N/A        |                   |                   | $R\bar{3}$ (148) |
| $\text{TmCl}_3$ |            | 88                         | 35398      | $R\bar{3}c$ (167) | Trigonal          |                  |
| $\text{ErCl}_3$ |            | 89                         | N/A        |                   |                   | $Cmcm$ (63)      |
| $\text{HoCl}_3$ |            | 90.1                       | N/A        |                   |                   | $Cmcm$ (63)      |
| $\text{DyCl}_3$ |            | 91.2                       | 40064      | $Cmcm$ (63)       | Orthorhombic      |                  |
| $\text{TbCl}_3$ |            | 92.3                       | 40553      | $Cmcm$ (63)       | Orthorhombic      |                  |
| $\text{GdCl}_3$ |            | 93.5                       | 22270      | $P6_3/m$ (176)    | Hexagonal         |                  |
| $\text{SmCl}_3$ |            | 95.8                       | N/A        |                   |                   | $P6_3/m$ (176)   |
| $\text{NdCl}_3$ |            | 98.3                       | 31577      | $P6_3/m$ (176)    | Hexagonal         |                  |
| $\text{LaCl}_3$ |            | 103.2                      | 22267      | $P6_3/m$ (176)    | Hexagonal         |                  |
| $\text{AlBr}_3$ |            | Group 13                   | 53.5       | 39768             | $P2_1/c$ (14)     | Monoclinic       |
| $\text{GaBr}_3$ | 62         |                            | 413456     | $P2_1/c$ (14)     | Monoclinic        |                  |
| $\text{InBr}_3$ | 80         |                            | 65198      | $C2/m$ (12)       | Monoclinic        |                  |
| $\text{TlBr}_3$ | 88.5       |                            | N/A        |                   |                   | $R\bar{3}$ (148) |
| $\text{BiBr}_3$ | Group 15   | 103                        | 100294     | $C2/m$ (12)       | Monoclinic        |                  |
| $\text{ScBr}_3$ | Group 3    | 74.5                       | N/A        |                   |                   | $R\bar{3}$ (148) |
| $\text{LuBr}_3$ |            | 86.1                       | N/A        |                   |                   | $Cmcm$ (63)      |
| $\text{YBr}_3$  |            | 90                         | N/A        |                   |                   | $Cmcm$ (63)      |
| $\text{YbBr}_3$ | Lanthanide | 86.8                       | 56430      | $R\bar{3}$ (148)  | Trigonal          |                  |

|                   |            |       |        |                               |              |                  |
|-------------------|------------|-------|--------|-------------------------------|--------------|------------------|
| TmCl <sub>3</sub> |            | 88    | N/A    |                               |              | $R\bar{3}$ (148) |
| ErBr <sub>3</sub> |            | 89    | N/A    |                               |              | $R\bar{3}$ (148) |
| HoBr <sub>3</sub> |            | 90.1  | N/A    |                               |              | <i>Cmcm</i> (63) |
| DyBr <sub>3</sub> |            | 91.2  | N/A    |                               |              | <i>Cmcm</i> (63) |
| TbBr <sub>3</sub> |            | 92.3  | N/A    |                               |              | <i>Cmcm</i> (63) |
| GdBr <sub>3</sub> |            | 93.5  | 2610   | <i>C2/m</i> (12)              | Monoclinic   |                  |
| SmBr <sub>3</sub> |            | 95.8  | 31591  | <i>Cmcm</i> (63)              | Orthorhombic |                  |
| NdBr <sub>3</sub> |            | 98.3  | 31590  | <i>Cmcm</i> (63)              | Orthorhombic |                  |
| LaBr <sub>3</sub> |            | 103.2 | 31581  | <i>P6<sub>3</sub>/m</i> (176) | Hexagonal    |                  |
| AlI <sub>3</sub>  | Group 13   | 53.5  | 391247 | <i>P2<sub>1</sub>/c</i> (14)  | Monoclinic   |                  |
| GaI <sub>3</sub>  |            | 62    | 413457 | <i>P2<sub>1</sub>/c</i> (14)  | Monoclinic   |                  |
| InI <sub>3</sub>  |            | 80    | 23136  | <i>P2<sub>1</sub>/c</i> (14)  | Monoclinic   |                  |
| TlI <sub>3</sub>  |            | 88.5  | 61349  | <i>Pnma</i> (62)              | Orthorhombic |                  |
| BiI <sub>3</sub>  | Group 15   | 103   | 26083  | $R\bar{3}$ (148)              | Trigonal     |                  |
| ScI <sub>3</sub>  | Group 3    | 74.5  | N/A    |                               |              | $R\bar{3}$ (148) |
| LuI <sub>3</sub>  |            | 86.1  | N/A    |                               |              | $R\bar{3}$ (148) |
| YI <sub>3</sub>   |            | 90    | N/A    |                               |              | $R\bar{3}$ (148) |
| YbI <sub>3</sub>  | Lanthanide | 86.8  | N/A    |                               |              | $R\bar{3}$ (148) |
| TmI <sub>3</sub>  |            | 88    | N/A    |                               |              | $R\bar{3}$ (148) |
| ErI <sub>3</sub>  |            | 89    | N/A    |                               |              | $R\bar{3}$ (148) |
| HoI <sub>3</sub>  |            | 90.1  | N/A    |                               |              | $R\bar{3}$ (148) |
| DyI <sub>3</sub>  |            | 91.2  | N/A    |                               |              | $R\bar{3}$ (148) |
| TbI <sub>3</sub>  |            | 92.3  | N/A    |                               |              | $R\bar{3}$ (148) |
| GdI <sub>3</sub>  |            | 93.5  | N/A    |                               |              | <i>Cmcm</i> (63) |
| SmI <sub>3</sub>  |            | 95.8  | N/A    |                               |              | <i>Cmcm</i> (63) |
| NdI <sub>3</sub>  |            | 98.3  | N/A    |                               |              | <i>Cmcm</i> (63) |
| LaI <sub>3</sub>  |            | 103.2 | 31596  | <i>Cmcm</i> (63)              | Orthorhombic |                  |

**Table S4.** Energy difference of  $\text{MX}_3$  compared to the lowest energy structure among the six experimental structures. For example,  $\text{InCl}_3$  exhibits the lowest total energy for the  $R\bar{3}$  structure among the six experimental structures, and the values show the total energy difference compared to the energy of  $R\bar{3}$  structure.

| $\text{MX}_3$   | $E_{\text{tot}} - E_{\text{tot, lowest E}} \text{ (meV/atom)}$ |                  |                |                     |                      |                   | Most stale phase |
|-----------------|----------------------------------------------------------------|------------------|----------------|---------------------|----------------------|-------------------|------------------|
|                 | $C2/m$<br>(12)                                                 | $P2_1/c$<br>(14) | $Cmcm$<br>(63) | $R\bar{3}$<br>(148) | $R\bar{3}c$<br>(167) | $P6_3/m$<br>(176) |                  |
| $\text{InCl}_3$ | 1                                                              | 94               | 111            | 0                   | 61                   | 133               | $R\bar{3}$       |
| $\text{TlCl}_3$ | 1                                                              | 56               | 74             | 0                   | 41                   | 94                | $R\bar{3}$       |
| $\text{BiCl}_3$ | 26                                                             | 55               | 0              | 26                  | 27                   | 16                | $Cmcm$           |
| $\text{LuCl}_3$ | 1                                                              | 51               | 16             | 0                   | 20                   | 47                | $R\bar{3}$       |
| $\text{YbCl}_3$ | 1                                                              | 28               | 4              | 0                   | 18                   | 32                | $R\bar{3}$       |
| $\text{ErCl}_3$ | 18                                                             | 63               | 0              | 18                  | 29                   | 19                | $Cmcm$           |
| $\text{HoCl}_3$ | 30                                                             | 51               | 0              | 29                  | 38                   | 14                | $Cmcm$           |
| $\text{SmCl}_3$ | 103                                                            | 113              | 13             | 103                 | 95                   | 0                 | $P6_3/m$         |
| $\text{TlBr}_3$ | 2                                                              | 41               | 83             | 0                   | 50                   | 100               | $R\bar{3}$       |
| $\text{ScBr}_3$ | 2                                                              | 66               | 74             | 0                   | 73                   | 99                | $R\bar{3}$       |
| $\text{LuBr}_3$ | 3                                                              | 44               | 0              | 1                   | 41                   | 102               | $Cmcm$           |
| $\text{YBr}_3$  | 7                                                              | 46               | 0              | 6                   | 43                   | 32                | $Cmcm$           |
| $\text{TmBr}_3$ | 2                                                              | 46               | 21             | 0                   | 46                   | 54                | $R\bar{3}$       |
| $\text{ErBr}_3$ | 2                                                              | 44               | 10             | 0                   | 43                   | 44                | $R\bar{3}$       |
| $\text{HoBr}_3$ | 3                                                              | 44               | 0              | 1                   | 41                   | 34                | $Cmcm$           |
| $\text{DyBr}_3$ | 14                                                             | 52               | 0              | 12                  | 49                   | 31                | $Cmcm$           |
| $\text{TbBr}_3$ | 25                                                             | 61               | 0              | 23                  | 57                   | 27                | $Cmcm$           |
| $\text{ScI}_3$  | 4                                                              | 72               | 79             | 0                   | 79                   | 106               | $R\bar{3}$       |
| $\text{LuI}_3$  | 3                                                              | 61               | 66             | 0                   | 70                   | 87                | $R\bar{3}$       |
| $\text{YI}_3$   | 4                                                              | 54               | 18             | 0                   | 61                   | 55                | $R\bar{3}$       |
| $\text{YbI}_3$  | 3                                                              | 60               | 56             | 0                   | 68                   | 81                | $R\bar{3}$       |
| $\text{TmI}_3$  | 3                                                              | 58               | 45             | 0                   | 66                   | 74                | $R\bar{3}$       |
| $\text{ErI}_3$  | 3                                                              | 56               | 35             | 0                   | 64                   | 68                | $R\bar{3}$       |
| $\text{HoI}_3$  | 4                                                              | 55               | 25             | 0                   | 63                   | 60                | $R\bar{3}$       |
| $\text{DyI}_3$  | 4                                                              | 53               | 14             | 0                   | 61                   | 52                | $R\bar{3}$       |
| $\text{TbI}_3$  | 4                                                              | 51               | 2              | 0                   | 59                   | 44                | $R\bar{3}$       |
| $\text{GdI}_3$  | 13                                                             | 58               | 0              | 9                   | 66                   | 43                | $Cmcm$           |
| $\text{SmI}_3$  | 37                                                             | 79               | 0              | 34                  | 85                   | 40                | $Cmcm$           |
| $\text{NdI}_3$  | 63                                                             | 100              | 0              | 59                  | 104                  | 30                | $Cmcm$           |



**Table S5.** Phase stability (decomposition energy,  $E_d$ ) of  $\text{Na}_3\text{MX}_6$  ( $X = \text{Cl}, \text{Br}, \text{I}$ ) with the crystal structures of  $P\bar{3}1c$ ,  $P2_1/n$ ,  $R\bar{3}$ ,  $C2/m$  and  $P\bar{3}m1$ , against competing phases  $\text{NaX}$  and  $\text{MX}_3$ .

| $\text{Na}_3\text{MX}_6$   | Type of M  | $E_d$ (meV/atom) |          |            |        |              | Most stable phase | Stability  |
|----------------------------|------------|------------------|----------|------------|--------|--------------|-------------------|------------|
|                            |            | $P\bar{3}1c$     | $P2_1/n$ | $R\bar{3}$ | $C2/m$ | $P\bar{3}m1$ |                   |            |
| $\text{Na}_3\text{AlCl}_6$ | Group 13   | 6.3              | 6.3      | 18.4       | 34.3   | 49.3         | $P\bar{3}1c$      | Metastable |
| $\text{Na}_3\text{GaCl}_6$ |            | 2.9              | 5.3      | 16.1       | 27.2   | 45.5         | $P\bar{3}1c$      | Metastable |
| $\text{Na}_3\text{InCl}_6$ |            | -4.3             | -2.0     | 1.8        | 14.0   | 24.7         | $P\bar{3}1c$      | Stable     |
| $\text{Na}_3\text{TlCl}_6$ |            | -1.7             | 2.3      | 2.6        | 12.0   | 23.8         | $P\bar{3}1c$      | Stable     |
| $\text{Na}_3\text{BiCl}_6$ | Group 15   | -17.9            | -20.8    | -27.0      | -12.8  | -10.2        | $R\bar{3}$        | Stable     |
| $\text{Na}_3\text{ScCl}_6$ | Group 3    | -3.5             | -6.4     | -0.5       | 16.0   | 22.7         | $P2_1/n$          | Stable     |
| $\text{Na}_3\text{LuCl}_6$ |            | -5.8             | -10.3    | -8.9       | 9.9    | 10.3         | $P2_1/n$          | Stable     |
| $\text{Na}_3\text{YCl}_6$  |            | -3.2             | -9.2     | -11.0      | 9.1    | 5.9          | $R\bar{3}$        | Stable     |
| $\text{Na}_3\text{YbCl}_6$ | Lanthanide | -5.2             | -10.0    | -9.1       | 9.8    | 9.5          | $P2_1/n$          | Stable     |
| $\text{Na}_3\text{TmCl}_6$ |            | -10.3            | -15.7    | -15.4      | 4.5    | 2.8          | $P2_1/n$          | Stable     |
| $\text{Na}_3\text{ErCl}_6$ |            | 2.6              | -2.8     | -3.2       | 16.3   | 14.6         | $R\bar{3}$        | Stable     |
| $\text{Na}_3\text{HoCl}_6$ |            | 7.9              | 2.2      | 1.2        | 20.9   | 18.5         | $R\bar{3}$        | Metastable |
| $\text{Na}_3\text{DyCl}_6$ |            | 13.2             | 7.1      | 5.4        | 25.4   | 22.3         | $R\bar{3}$        | Metastable |
| $\text{Na}_3\text{TbCl}_6$ |            | 18.6             | 12.1     | 9.5        | 30.0   | 26.0         | $R\bar{3}$        | Metastable |
| $\text{Na}_3\text{GdCl}_6$ |            | 25.1             | 18.0     | 14.7       | 35.5   | 30.7         | $R\bar{3}$        | Metastable |
| $\text{Na}_3\text{SmCl}_6$ |            | 42.8             | 34.5     | 28.9       | 50.9   | 43.8         | $R\bar{3}$        | Unstable   |
| $\text{Na}_3\text{NdCl}_6$ |            | 61.2             | 50.8     | 42.7       | 66.2   | 56.6         | $R\bar{3}$        | Unstable   |
| $\text{Na}_3\text{LaCl}_6$ |            | 76.1             | 63.3     | 52.4       | 78.0   | 64.8         | $R\bar{3}$        | Unstable   |
| $\text{Na}_3\text{AlBr}_6$ | Group 13   | 8.3              | 11.6     | 22.4       | 23.8   | 43.5         | $P\bar{3}1c$      | Metastable |
| $\text{Na}_3\text{GaBr}_6$ |            | 37.6             | 43.4     | 52.6       | 50.1   | 72.9         | $P\bar{3}1c$      | Unstable   |
| $\text{Na}_3\text{InBr}_6$ |            | 10.6             | 17.1     | 20.6       | 18.5   | 37.0         | $P\bar{3}1c$      | Metastable |
| $\text{Na}_3\text{TlBr}_6$ |            | 11.2             | 19.7     | 20.4       | 17.1   | 36.0         | $P\bar{3}1c$      | Metastable |
| $\text{Na}_3\text{BiBr}_6$ | Group 15   | 8.3              | 12.2     | 8.4        | 7.0    | 20.6         | $C2/m$            | Metastable |
| $\text{Na}_3\text{ScBr}_6$ | Group 3    | 12.8             | 13.0     | 19.2       | 22.9   | 34.9         | $P\bar{3}1c$      | Metastable |
| $\text{Na}_3\text{LuBr}_6$ |            | 19.1             | 18.6     | 21.1       | 26.0   | 34.7         | $P2_1/n$          | Metastable |
| $\text{Na}_3\text{YBr}_6$  |            | 8.5              | 8.3      | 8.0        | 13.7   | 19.8         | $R\bar{3}$        | Metastable |
| $\text{Na}_3\text{YbBr}_6$ | Lanthanide | 6.3              | 6.2      | 8.3        | 13.1   | 21.5         | $P2_1/n$          | Metastable |
| $\text{Na}_3\text{TmBr}_6$ |            | 6.3              | 5.9      | 7.6        | 12.5   | 20.4         | $P2_1/n$          | Metastable |

|                                   |            |      |      |      |      |      |              |            |
|-----------------------------------|------------|------|------|------|------|------|--------------|------------|
| Na <sub>3</sub> ErBr <sub>6</sub> |            | 6.2  | 5.9  | 7.1  | 12.3 | 19.9 | $P2_1/n$     | Metastable |
| Na <sub>3</sub> HoBr <sub>6</sub> |            | 7.5  | 6.2  | 6.9  | 12.3 | 19.0 | $P2_1/n$     | Metastable |
| Na <sub>3</sub> DyBr <sub>6</sub> |            | 11.1 | 11.0 | 10.6 | 16.1 | 22.4 | $R\bar{3}$   | Metastable |
| Na <sub>3</sub> TbBr <sub>6</sub> |            | 16.1 | 15.3 | 14.4 | 20.0 | 25.9 | $R\bar{3}$   | Metastable |
| Na <sub>3</sub> GdBr <sub>6</sub> |            | 6.2  | 6.1  | 3.8  | 9.8  | 15.1 | $R\bar{3}$   | Metastable |
| Na <sub>3</sub> SmBr <sub>6</sub> |            | 32.4 | 30.4 | 27.0 | 33.6 | 37.6 | $R\bar{3}$   | Unstable   |
| Na <sub>3</sub> NdBr <sub>6</sub> |            | 43.8 | 41.0 | 35.7 | 43.6 | 45.5 | $R\bar{3}$   | Unstable   |
| Na <sub>3</sub> LaBr <sub>6</sub> |            | 58.4 | 54.1 | 46.4 | 56.6 | 55.2 | $R\bar{3}$   | Unstable   |
| Na <sub>3</sub> AlI <sub>6</sub>  | Group 13   | 42.2 | 47.3 | 54.0 | 46.4 | 64.8 | $P\bar{3}1c$ | Unstable   |
| Na <sub>3</sub> GaI <sub>6</sub>  |            | 72.5 | 79.5 | 85.6 | 75.9 | 96.4 | $P\bar{3}1c$ | Unstable   |
| Na <sub>3</sub> InI <sub>6</sub>  |            | 12.9 | 23.3 | 24.6 | 13.1 | 32.9 | $P\bar{3}1c$ | Metastable |
| Na <sub>3</sub> TlI <sub>6</sub>  |            | 79.1 | 91.2 | 90.1 | 78.1 | 98.5 | $C2/m$       | Unstable   |
| Na <sub>3</sub> BiI <sub>6</sub>  | Group 15   | 21.2 | 30.9 | 27.8 | 13.7 | 33.2 | $C2/m$       | Metastable |
| Na <sub>3</sub> ScI <sub>6</sub>  | Group 3    | 28.0 | 30.6 | 35.3 | 30.1 | 42.7 | $P\bar{3}1c$ | Unstable   |
| Na <sub>3</sub> LuI <sub>6</sub>  |            | 20.4 | 24.1 | 25.1 | 19.4 | 31.4 | $C2/m$       | Metastable |
| Na <sub>3</sub> YI <sub>6</sub>   |            | 17.6 | 22.7 | 21.8 | 16.2 | 27.3 | $C2/m$       | Metastable |
| Na <sub>3</sub> YbI <sub>6</sub>  | Lanthanide | 19.1 | 23.8 | 24.4 | 18.7 | 30.7 | $C2/m$       | Metastable |
| Na <sub>3</sub> TmI <sub>6</sub>  |            | 18.7 | 23.5 | 23.6 | 18.0 | 29.7 | $C2/m$       | Metastable |
| Na <sub>3</sub> ErI <sub>6</sub>  |            | 18.6 | 23.2 | 23.1 | 17.5 | 29.1 | $C2/m$       | Metastable |
| Na <sub>3</sub> HoI <sub>6</sub>  |            | 18.1 | 23.0 | 22.5 | 16.9 | 28.3 | $C2/m$       | Metastable |
| Na <sub>3</sub> DyI <sub>6</sub>  |            | 17.6 | 22.7 | 21.8 | 16.3 | 27.4 | $C2/m$       | Metastable |
| Na <sub>3</sub> TbI <sub>6</sub>  |            | 17.4 | 22.4 | 21.2 | 15.6 | 26.5 | $C2/m$       | Metastable |
| Na <sub>3</sub> GdI <sub>6</sub>  |            | 21.0 | 25.9 | 24.4 | 18.6 | 29.4 | $C2/m$       | Metastable |
| Na <sub>3</sub> SmI <sub>6</sub>  |            | 31.8 | 35.4 | 32.6 | 26.9 | 36.9 | $C2/m$       | Unstable   |
| Na <sub>3</sub> NdI <sub>6</sub>  |            | 40.5 | 45.1 | 40.9 | 35.4 | 44.7 | $C2/m$       | Unstable   |
| Na <sub>3</sub> LaI <sub>6</sub>  |            | 53.6 | 52.2 | 45.9 | 41.9 | 49.1 | $C2/m$       | Unstable   |

**Table S6.** Most stable structures of  $\text{Na}_3\text{MX}_6$  ( $X = \text{Cl}, \text{Br}, \text{I}$ ) among the crystal structures of  $P\bar{3}1c$ ,  $P2_1/n$ ,  $R\bar{3}$ ,  $C2/m$  and  $P\bar{3}m1$ , their decomposition energy,  $E_d$ , and stability against competing phases  $\text{NaX}$  and  $\text{MX}_3$ .

| Type of M  | M  | $M_{\text{Radii}}$<br>(pm) | $\text{Na}_3\text{MCl}_6$ |                     |            | $\text{Na}_3\text{MBr}_6$ |                     |            | $\text{Na}_3\text{MI}_6$ |                     |            |
|------------|----|----------------------------|---------------------------|---------------------|------------|---------------------------|---------------------|------------|--------------------------|---------------------|------------|
|            |    |                            | Most stable phase         | $E_d$<br>(meV/atom) | Stability  | Most stable phase         | $E_d$<br>(meV/atom) | Stability  | Most stable phase        | $E_d$<br>(meV/atom) | Stability  |
| Group 13   | Al | 54                         | $P\bar{3}1c$              | 6                   | Metastable | $P\bar{3}1c$              | 8                   | Metastable | $P\bar{3}1c$             | 42                  | Unstable   |
|            | Ga | 62                         | $P\bar{3}1c$              | 3                   | Metastable | $P\bar{3}1c$              | 38                  | Unstable   | $P\bar{3}1c$             | 72                  | Unstable   |
|            | In | 80                         | $P\bar{3}1c$              | -4                  | Stable     | $P\bar{3}1c$              | 11                  | Metastable | $P\bar{3}1c$             | 13                  | Metastable |
|            | Tl | 89                         | $P\bar{3}1c$              | -2                  | Stable     | $P\bar{3}1c$              | 11                  | Metastable | $C2/m$                   | 78                  | Unstable   |
| Group 15   | Bi | 103                        | $R\bar{3}$                | -27                 | Stable     | $C2/m$                    | 7                   | Metastable | $C2/m$                   | 14                  | Metastable |
| Group 3    | Sc | 75                         | $P2_1/n$                  | -6                  | Stable     | $P\bar{3}1c$              | 13                  | Metastable | $P\bar{3}1c$             | 28                  | Unstable   |
|            | Lu | 86                         | $P2_1/n$                  | -10                 | Stable     | $P2_1/n$                  | 19                  | Metastable | $C2/m$                   | 19                  | Metastable |
|            | Y  | 90                         | $R\bar{3}$                | -11                 | Stable     | $R\bar{3}$                | 8                   | Metastable | $C2/m$                   | 16                  | Metastable |
| Lanthanide | Yb | 87                         | $P2_1/n$                  | -10                 | Stable     | $P2_1/n$                  | 6                   | Metastable | $C2/m$                   | 19                  | Metastable |
|            | Tm | 88                         | $P2_1/n$                  | -16                 | Stable     | $P2_1/n$                  | 6                   | Metastable | $C2/m$                   | 18                  | Metastable |
|            | Er | 89                         | $R\bar{3}$                | -3                  | Stable     | $P2_1/n$                  | 6                   | Metastable | $C2/m$                   | 17                  | Metastable |
|            | Ho | 90                         | $R\bar{3}$                | 1                   | Metastable | $P2_1/n$                  | 6                   | Metastable | $C2/m$                   | 17                  | Metastable |
|            | Dy | 91                         | $R\bar{3}$                | 5                   | Metastable | $R\bar{3}$                | 11                  | Metastable | $C2/m$                   | 16                  | Metastable |
|            | Tb | 92                         | $R\bar{3}$                | 9                   | Metastable | $R\bar{3}$                | 14                  | Metastable | $C2/m$                   | 16                  | Metastable |
|            | Gd | 94                         | $R\bar{3}$                | 15                  | Metastable | $R\bar{3}$                | 4                   | Metastable | $C2/m$                   | 19                  | Metastable |
|            | Sm | 96                         | $R\bar{3}$                | 29                  | Unstable   | $R\bar{3}$                | 27                  | Unstable   | $C2/m$                   | 27                  | Unstable   |
|            | Nd | 98                         | $R\bar{3}$                | 43                  | Unstable   | $R\bar{3}$                | 36                  | Unstable   | $C2/m$                   | 35                  | Unstable   |
|            | La | 103                        | $R\bar{3}$                | 52                  | Unstable   | $R\bar{3}$                | 46                  | Unstable   | $C2/m$                   | 42                  | Unstable   |

**Table S7.** Phase stability (decomposition energy,  $E_d$ ) of  $\text{Na}_3\text{MX}_6$  ( $X = \text{Cl}, \text{Br}, \text{I}$ ) against the competing phases  $\text{NaMX}_4$  (space group:  $P2_12_12_1$ ) and  $\text{NaX}$  for the relatively small  $M$  with the ionic radii below 80 pm.

|                            | M  | X  | $r_M$<br>(pm) | $r_X$<br>(pm) | Octahedral<br>factor $\text{MX}_6$<br>( $r_M / r_X$ ) | Decomposition<br>energy<br>(meV/atom) | Stability  |
|----------------------------|----|----|---------------|---------------|-------------------------------------------------------|---------------------------------------|------------|
| $\text{Na}_3\text{AlCl}_6$ | Al | Cl | 54            | 181           | 0.30                                                  | 21                                    | Metastable |
| $\text{Na}_3\text{GaCl}_6$ | Ga | Cl | 62            | 181           | 0.34                                                  | 41                                    | Unstable   |
| $\text{Na}_3\text{InCl}_6$ | In | Cl | 80            | 181           | 0.44                                                  | -26                                   | Stable     |
| $\text{Na}_3\text{ScCl}_6$ | Sc | Cl | 75            | 181           | 0.41                                                  | -35                                   | Stable     |
| $\text{Na}_3\text{AlBr}_6$ | Al | Br | 54            | 196           | 0.28                                                  | 36                                    | Unstable   |
| $\text{Na}_3\text{GaBr}_6$ | Ga | Br | 62            | 196           | 0.32                                                  | 58                                    | Unstable   |
| $\text{Na}_3\text{InBr}_6$ | In | Br | 80            | 196           | 0.41                                                  | -6                                    | Stable     |
| $\text{Na}_3\text{ScBr}_6$ | Sc | Br | 75            | 196           | 0.38                                                  | -27                                   | Stable     |
| $\text{Na}_3\text{AlI}_6$  | Al | I  | 54            | 220           | 0.25                                                  | 55                                    | Unstable   |
| $\text{Na}_3\text{GaI}_6$  | Ga | I  | 62            | 220           | 0.28                                                  | 79                                    | Unstable   |
| $\text{Na}_3\text{InI}_6$  | In | I  | 80            | 220           | 0.36                                                  | 19                                    | Metastable |
| $\text{Na}_3\text{ScI}_6$  | Sc | I  | 75            | 220           | 0.34                                                  | -45                                   | Stable     |

**Table S8.** Na-ion migration energy barrier ( $E_a$ ) in  $\text{Na}_3\text{MX}_6$  (M = In, Er, Gd; X = Cl, Br) and  $\text{Na}_3\text{GdI}_6$ , predicted using the BVSE method.

|                            | Crystal system | Space group  | $E_a$ (eV) |            |
|----------------------------|----------------|--------------|------------|------------|
|                            |                |              | 1D         | 3D         |
| $\text{Na}_3\text{InCl}_6$ | Trigonal       | $P\bar{3}1c$ | 0.45       | 0.53       |
| $\text{Na}_3\text{ErCl}_6$ | Monoclinic     | $P2_1/n$     | N/A        | 0.60, 0.70 |
| $\text{Na}_3\text{GdCl}_6$ | Trigonal       | $R\bar{3}$   | 0.35       | 0.65       |
| $\text{Na}_3\text{InBr}_6$ | Trigonal       | $P\bar{3}1c$ | 0.42       | 0.49       |
| $\text{Na}_3\text{ErBr}_6$ | Monoclinic     | $P2_1/n$     | N/A        | 0.52, 0.54 |
| $\text{Na}_3\text{GdBr}_6$ | Trigonal       | $R\bar{3}$   | 0.31       | 0.52       |
| $\text{Na}_3\text{GdI}_6$  | Monoclinic     | $C2/m$       | N/A        | 0.48       |

**Table S9.** Predicted Na-ion conductivity at 300 K and the activation energy of Na<sub>3</sub>InBr<sub>6</sub>, Na<sub>3</sub>GdBr<sub>6</sub>, Na<sub>3</sub>YI<sub>6</sub> and Na<sub>3</sub>GdI<sub>6</sub> from the Arrhenius plots of Na-ion conductivity.

|                                                    | Activation energy, $E_a$<br>(eV) | Ionic conductivity<br>(S cm <sup>-1</sup> ) | Ionic conductivity<br>Error bound<br>[min, max]<br>(S cm <sup>-1</sup> ) |
|----------------------------------------------------|----------------------------------|---------------------------------------------|--------------------------------------------------------------------------|
| Na <sub>3</sub> YI <sub>6</sub> ( <i>C2/m</i> )    | 0.34 ± 0.02                      | 2.4 × 10 <sup>-4</sup>                      | [8.6×10 <sup>-5</sup> , 6.9×10 <sup>-4</sup> ]                           |
| Na <sub>3</sub> GdI <sub>6</sub> ( <i>C2/m</i> )   | 0.30 ± 0.01                      | 5.9 × 10 <sup>-4</sup>                      | [3.5×10 <sup>-4</sup> , 1.0×10 <sup>-3</sup> ]                           |
| Na <sub>3</sub> InBr <sub>6</sub> ( <i>P3̄1c</i> ) | 0.37 ± 0.01                      | 5.8 × 10 <sup>-5</sup>                      | [2.9×10 <sup>-5</sup> , 1.2×10 <sup>-4</sup> ]                           |
| Na <sub>3</sub> GdBr <sub>6</sub> ( <i>R3̄</i> )   | 0.50 ± 0.03                      | 1.2 × 10 <sup>-6</sup>                      | [2.3×10 <sup>-7</sup> , 6.5×10 <sup>-6</sup> ]                           |

**Table S10.** Phase stability (decomposition energy,  $E_D$ ) of  $\text{Na}_3\text{MBr}_x\text{I}_{6-x}$  ( $M = \text{Y}, \text{Gd}$ ) with the crystal structures of  $R\bar{3}$  and  $C2/m$ .

| $\text{Na}_3\text{MBr}_x\text{I}_{6-x}$  | x | Composition                          | $E_D$ (meV/atom) |            | Phase preference |
|------------------------------------------|---|--------------------------------------|------------------|------------|------------------|
|                                          |   |                                      | $C2/m$           | $R\bar{3}$ |                  |
| $\text{Na}_3\text{YBr}_x\text{I}_{6-x}$  | 0 | $\text{Na}_3\text{YI}_6$             | 16               | 22         | $C2/m$           |
|                                          | 1 | $\text{Na}_3\text{YBrI}_5$           | 17               | 22         | $C2/m$           |
|                                          | 2 | $\text{Na}_3\text{YBr}_2\text{I}_4$  | 18               | 22         | $C2/m$           |
|                                          | 3 | $\text{Na}_3\text{YBr}_3\text{I}_3$  | 19               | 20         | $C2/m$           |
|                                          | 4 | $\text{Na}_3\text{YBr}_4\text{I}_2$  | 18               | 17         | $R\bar{3}$       |
|                                          | 5 | $\text{Na}_3\text{YBr}_5\text{I}$    | 13               | 13         | $R\bar{3}$       |
|                                          | 6 | $\text{Na}_3\text{YBr}_6$            | 14               | 8          | $R\bar{3}$       |
| $\text{Na}_3\text{GdBr}_x\text{I}_{6-x}$ | 0 | $\text{Na}_3\text{GdI}_6$            | 19               | 24         | $C2/m$           |
|                                          | 1 | $\text{Na}_3\text{GdBrI}_5$          | 19               | 24         | $C2/m$           |
|                                          | 2 | $\text{Na}_3\text{GdBr}_2\text{I}_4$ | 18               | 23         | $C2/m$           |
|                                          | 3 | $\text{Na}_3\text{GdBr}_3\text{I}_3$ | 17               | 20         | $C2/m$           |
|                                          | 4 | $\text{Na}_3\text{GdBr}_4\text{I}_2$ | 14               | 16         | $C2/m$           |
|                                          | 5 | $\text{Na}_3\text{GdBr}_5\text{I}$   | 10               | 11         | $R\bar{3}$       |
|                                          | 6 | $\text{Na}_3\text{GdBr}_6$           | 10               | 4          | $R\bar{3}$       |

**Table S11.** Predicted Na-ion conductivity at 300 K and the activation energy of Na<sub>3</sub>YBr<sub>3</sub>I<sub>3</sub> and Na<sub>3</sub>GdBr<sub>3</sub>I<sub>3</sub> from the Arrhenius plots.

|                                                         | Activation energy,<br>$E_a$<br>(eV) | Ionic conductivity<br>(S cm <sup>-1</sup> ) | Ionic conductivity<br>Error bound [min, max]<br>(S cm <sup>-1</sup> ) |
|---------------------------------------------------------|-------------------------------------|---------------------------------------------|-----------------------------------------------------------------------|
| Na <sub>3</sub> YBr <sub>3</sub> I <sub>3</sub> (C2/m)  | 0.25 ± 0.02                         | 3.3 × 10 <sup>-3</sup>                      | [1.5×10 <sup>-3</sup> , 7.4×10 <sup>-3</sup> ]                        |
| Na <sub>3</sub> GdBr <sub>3</sub> I <sub>3</sub> (C2/m) | 0.21 ± 0.02                         | 7.5 × 10 <sup>-3</sup>                      | [3.2×10 <sup>-3</sup> , 1.8×10 <sup>-2</sup> ]                        |



**Table S12.** Electrochemical stability window of  $\text{Na}_3\text{MX}_6$  ( $X = \text{Cl}, \text{Br}, \text{I}$ ) including phase equilibria at reduction and oxidation potentials.

| $\text{Na}_3\text{MX}_6$   | Type of M    | Reduction Potential (V) | Phase equilibria at the reduction potential | Oxidation Potential (V) | Phase equilibria at the oxidation potential |
|----------------------------|--------------|-------------------------|---------------------------------------------|-------------------------|---------------------------------------------|
| $\text{Na}_3\text{InCl}_6$ | Group 13, 15 | 2.14                    | $\text{InCl}, \text{NaCl}$                  | 4.08                    | $\text{NaCl}_3, \text{InCl}_3$              |
| $\text{Na}_3\text{BiCl}_6$ |              | 2.25                    | $\text{Bi}, \text{NaCl}$                    | 3.94                    | $\text{NaCl}_3, \text{BiCl}_3$              |
| $\text{Na}_3\text{ScCl}_6$ | Group 3      | 0.85                    | $\text{Sc}_5\text{Cl}_8, \text{NaCl}$       | 3.76                    | $\text{NaScCl}_4, \text{NaCl}_3$            |
| $\text{Na}_3\text{LuCl}_6$ |              | 0.56                    | $\text{Lu}, \text{NaCl}$                    | 3.77                    | $\text{NaCl}_3, \text{NaLuCl}_4$            |
| $\text{Na}_3\text{YCl}_6$  |              | 0.53                    | $\text{Y}, \text{NaCl}$                     | 3.82                    | $\text{NaCl}_3, \text{YCl}_3$               |
| $\text{Na}_3\text{TmCl}_6$ | Lanthanide   | 0.55                    | $\text{Tm}, \text{NaCl}$                    | 3.86                    | $\text{NaCl}_3, \text{TmCl}_3$              |
| $\text{Na}_3\text{ErCl}_6$ |              | 0.52                    | $\text{Er}, \text{NaCl}$                    | 3.86                    | $\text{NaCl}_3, \text{NaErCl}_4$            |
| $\text{Na}_3\text{HoCl}_6$ |              | 0.52                    | $\text{Ho}, \text{NaCl}$                    | 3.92                    | $\text{NaCl}_3, \text{NaHoCl}_4$            |
| $\text{Na}_3\text{DyCl}_6$ |              | 0.52                    | $\text{Dy}, \text{NaCl}$                    | 3.89                    | $\text{NaCl}_3, \text{DyCl}_3$              |
| $\text{Na}_3\text{TbCl}_6$ |              | 0.52                    | $\text{Tb}, \text{NaCl}$                    | 3.87                    | $\text{NaCl}_3, \text{TbCl}_3$              |
| $\text{Na}_3\text{GdCl}_6$ |              | 0.53                    | $\text{Gd}, \text{NaCl}$                    | 3.88                    | $\text{NaGdCl}_4, \text{NaCl}_3$            |
| $\text{Na}_3\text{InBr}_6$ | Group 13, 15 | 2.19                    | $\text{InBr}_2, \text{NaBr}$                | 3.70                    | $\text{InBr}_3, \text{Br}$                  |
| $\text{Na}_3\text{BiBr}_6$ |              | 2.14                    | $\text{Bi}, \text{NaBr}$                    | 3.70                    | $\text{BiBr}_3, \text{Br}$                  |
| $\text{Na}_3\text{ScBr}_6$ | Group 3      | 0.84                    | $\text{Sc}, \text{NaBr}$                    | 3.80                    | $\text{ScBr}_3, \text{Br}$                  |
| $\text{Na}_3\text{LuBr}_6$ |              | 0.69                    | $\text{Lu}, \text{NaBr}$                    | 3.76                    | $\text{LuBr}_3, \text{Br}$                  |
| $\text{Na}_3\text{YBr}_6$  |              | 0.62                    | $\text{Y}_2\text{Br}_3, \text{NaBr}$        | 3.70                    | $\text{YBr}_3, \text{Br}$                   |
| $\text{Na}_3\text{TmBr}_6$ | Lanthanide   | 0.67                    | $\text{Tm}, \text{NaBr}$                    | 3.75                    | $\text{TmBr}_3, \text{Br}$                  |
| $\text{Na}_3\text{ErBr}_6$ |              | 0.62                    | $\text{Er}, \text{NaBr}$                    | 3.70                    | $\text{ErBr}_3, \text{Br}$                  |
| $\text{Na}_3\text{HoBr}_6$ |              | 0.67                    | $\text{Ho}, \text{NaBr}$                    | 3.75                    | $\text{HoBr}_3, \text{Br}$                  |
| $\text{Na}_3\text{DyBr}_6$ |              | 0.62                    | $\text{Dy}, \text{NaBr}$                    | 3.77                    | $\text{DyBr}_3, \text{Br}$                  |
| $\text{Na}_3\text{TbBr}_6$ |              | 0.62                    | $\text{Tb}, \text{NaBr}$                    | 3.77                    | $\text{TbBr}_3, \text{Br}$                  |
| $\text{Na}_3\text{GdBr}_6$ |              | 0.61                    | $\text{Gd}, \text{NaBr}$                    | 3.70                    | $\text{GdBr}_3, \text{Br}$                  |
| $\text{Na}_3\text{InI}_6$  | Group 13, 15 | 1.93                    | $\text{InI}, \text{NaI}$                    | 2.93                    | $\text{NaInI}_4, \text{I}$                  |
| $\text{Na}_3\text{BiI}_6$  |              | 1.91                    | $\text{Bi}, \text{NaI}$                     | 2.93                    | $\text{BiI}_3, \text{I}$                    |
| $\text{Na}_3\text{ScI}_6$  | Group 3      | 1.42                    | $\text{Na}(\text{ScI}_3)_2, \text{NaI}$     | 2.98                    | $\text{ScI}_3, \text{I}$                    |
| $\text{Na}_3\text{LuI}_6$  |              | 0.74                    | $\text{Lu}, \text{NaI}$                     | 2.99                    | $\text{LuI}_3, \text{I}$                    |
| $\text{Na}_3\text{YI}_6$   |              | 0.63                    | $\text{Y}, \text{NaI}$                      | 2.93                    | $\text{YI}_3, \text{I}$                     |
| $\text{Na}_3\text{TmI}_6$  | Lanthanide   | 0.72                    | $\text{Tm}, \text{NaI}$                     | 2.98                    | $\text{TmI}_3, \text{I}$                    |
| $\text{Na}_3\text{ErI}_6$  |              | 0.70                    | $\text{Er}, \text{NaI}$                     | 2.99                    | $\text{ErI}_3, \text{I}$                    |
| $\text{Na}_3\text{HoI}_6$  |              | 0.69                    | $\text{Ho}, \text{NaI}$                     | 2.97                    | $\text{HoI}_3, \text{I}$                    |
| $\text{Na}_3\text{DyI}_6$  |              | 0.69                    | $\text{Dy}, \text{NaI}$                     | 2.97                    | $\text{DyI}_3, \text{I}$                    |
| $\text{Na}_3\text{TbI}_6$  |              | 0.68                    | $\text{Tb}, \text{NaI}$                     | 2.97                    | $\text{TmI}_3, \text{I}$                    |
| $\text{Na}_3\text{GdI}_6$  |              | 0.65                    | $\text{Gd}, \text{NaI}$                     | 2.96                    | $\text{GdI}_3, \text{I}$                    |
